## CD206<sup>+</sup>IL-4R $\alpha$ <sup>+</sup> MACROPHAGES ARE DRIVERS OF ADVERSE CARDIAC REMODELING IN ISCHEMIC CARDIOMYOPATHY

Qiongxin Wang, PhD;<sup>1,2,3</sup> Mohamed Ameen Ismahil, PhD;<sup>1,3</sup> Yujie Zhu, MD, PhD;<sup>1,3</sup> Gregg Rokosh, PhD;<sup>1,3</sup> Tariq Hamid, PhD;<sup>1,3</sup> Guihua Zhou, MD, PhD;<sup>1</sup> Steven M. Pogwizd, MD;<sup>1</sup> Sumanth D. Prabhu, MD<sup>1,3</sup>

<sup>1</sup>Division of Cardiovascular Disease, University of Alabama at Birmingham, Birmingham, AL

<sup>2</sup>Department of Cardiology, Zhongnan Hospital of Wuhan University, Wuhan, China,

<sup>3</sup>Division of Cardiology, Department of Medicine, Washington University School of Medicine, St. Louis, MO

Running title: Alternatively activated macrophages promote adverse cardiac remodeling

### Corresponding Author:

Sumanth D. Prabhu, MD  
Lewin Distinguished Professor and Chief  
Division of Cardiology  
Washington University School of Medicine  
660 S. Euclid Ave  
CB 8086  
St. Louis, MO 63110  
Tel: 314-362-8908  
Fax: 314-454-5550  
Email: [prabhu@wustl.edu](mailto:prabhu@wustl.edu)

## NONSTANDARD ABBREVIATIONS AND ACRONYMS

|                                |                                |
|--------------------------------|--------------------------------|
| <b>LV</b>                      | left ventricular               |
| <b>MI</b>                      | myocardial infarction          |
| <b>HF</b>                      | heart failure                  |
| <b>EF</b>                      | ejection fraction              |
| <b>EDV</b>                     | end-diastolic volume           |
| <b>ESV</b>                     | end-systolic volume            |
| <b>LVAD</b>                    | left ventricular assist device |
| <b>BMDM</b>                    | bone marrow-derived macrophage |
| <b>cMSC</b>                    | cardiac mesenchymal stem cell  |
| <b>ASO</b>                     | antisense oligonucleotide      |
| <b>CCR2</b>                    | C-C motif chemokine receptor 2 |
| <b>IL</b>                      | interleukin                    |
| <b>TGF-<math>\beta</math></b>  | tumor growth factor- $\beta$   |
| <b>Arg1</b>                    | arginase 1                     |
| <b>FIZZ</b>                    | found in inflammatory zone     |
| <b>Col</b>                     | collagen                       |
| <b>PDGF</b>                    | platelet-derived growth factor |
| <b><math>\alpha</math>-SMA</b> | $\alpha$ -smooth muscle actin  |
| <b>NICD</b>                    | Notch intracellular domain     |

1 **ABSTRACT**

2 **BACKGROUND:** Cardiac CD206<sup>+</sup> macrophages expand acutely after myocardial infarction (MI)  
3 to promote wound healing; however, their role in chronic heart failure (HF) is unknown. We  
4 tested the hypothesis that cardiac CD206<sup>+</sup> macrophages expressing interleukin(IL)-4R $\alpha$  are key  
5 drivers of adverse left ventricular (LV) remodeling in HF.

6 **METHODS AND RESULTS:** Adult male C57BL/6 mice underwent non-reperfused MI to induce  
7 HF, or sham operation, and cardiac macrophages were profiled using flow cytometry. As  
8 compared to sham, CD206<sup>+</sup> macrophages steadily expanded in post-MI hearts during LV  
9 remodeling, such that at 8 w post-MI they comprised ~85% of all macrophages. These  
10 macrophages were robustly proliferative and predominantly C-C motif chemokine receptor  
11 (CCR2)<sup>-</sup> and major histocompatibility complex (MHC)II<sup>hi</sup>, with >90% of CD206<sup>+</sup>CCR2<sup>-</sup>  
12 macrophages expressing the resident macrophage marker LYVE-1. CD206<sup>+</sup> macrophage  
13 abundance correlated with LV dysfunction and fibrosis. Nearly half of CD206<sup>+</sup> macrophages  
14 expressed IL-4R $\alpha$ , and the majority of CD206<sup>+</sup>IL-4R $\alpha$ <sup>+</sup> macrophages co-expressed the pro-  
15 fibrotic protein found in inflammatory zone (FIZZ)1. IL-4-polarized bone marrow derived CD206<sup>+</sup>  
16 macrophages also exhibited marked upregulation of FIZZ1 and induced FIZZ1-dependent  
17 myofibroblast differentiation of cardiac mesenchymal stem cells (cMSCs), in part related to DLL-  
18 4/Jagged1-Notch1 signaling. Intramyocardial adoptive transfer of M[IL-4], but not M[IL-10],  
19 CD206<sup>+</sup> macrophages to naïve mice, induced progressive LV remodeling over 4 weeks,  
20 increasing fibrosis, cardiomyocyte hypertrophy, and apoptosis. Myeloid-specific IL-4R $\alpha$  gene  
21 deletion in established HF (initiated 4 w post-MI) in IL-4R $\alpha$ <sup>fl/fl</sup>LysM-Cre<sup>ERT2</sup> mice significantly  
22 reduced CD206<sup>+</sup> macrophage proliferation and effectively depleted CD206<sup>+</sup>IL-4R $\alpha$ <sup>+</sup> cardiac  
23 macrophages. This was associated with abrogation of LV remodeling progression, reduction of  
24 cardiac fibrosis, and improved neovascularization. *In vivo* IL-4R $\alpha$  gene silencing in mice with  
25 established HF effectively depleted cardiac CD206<sup>+</sup>IL-4R $\alpha$ <sup>+</sup> macrophages and reversed LV

26 remodeling, improving fibrosis, neovascularization, and dysfunction, and suppressed both local  
27 and systemic inflammation. Lastly, alternatively activated CD206<sup>+</sup> and CD163<sup>+</sup> macrophages  
28 were significantly expanded in human failing hearts and correlated with fibrosis. The majority of  
29 CD163<sup>+</sup> macrophages expressed IL-4R $\alpha$  and FIZZ3, the human homolog of FIZZ1.

30 **CONCLUSION:** Cardiac CD206<sup>+</sup>IL-4R $\alpha$ <sup>+</sup> macrophages proliferate and expand in HF and are  
31 key mediators of pathological remodeling and fibrosis, in part through the secretion of FIZZ1.  
32 Inhibition of CD206<sup>+</sup> macrophage IL-4R $\alpha$  signaling alleviates LV remodeling in ischemic  
33 cardiomyopathy.

34

35 **Key Words:** CD206<sup>+</sup> macrophages; fibrosis; heart failure; interleukin 4 receptor- $\alpha$ ; inflammation

36 **CLINICAL PERSPECTIVE**

37

38 *What is new?*

- 39 • In the failing heart after myocardial infarction (MI), CD206<sup>+</sup> macrophages, primarily CCR2<sup>-</sup>,  
40 MHCII<sup>hi</sup>, and LYVE1<sup>+</sup>, robustly proliferate with a subpopulation expressing IL-4R $\alpha$ ;  
41 myeloid-specific IL-4R $\alpha$  deletion or IL-4R $\alpha$  silencing *in vivo* tempered CD206<sup>+</sup>  
42 macrophage proliferation and alleviated LV dysfunction, fibrosis, and remodeling.
- 43 • M[IL-4] CD206<sup>+</sup> bone-marrow derived macrophages induced upregulation of *Fizz1*, and  
44 FIZZ1-dependent cardiac mesenchymal myofibroblast differentiation; intramyocardial  
45 adoptive transfer of M[IL-4] macrophages induced cardiac remodeling and fibrosis.
- 46 • Humans exhibit expansion of alternatively activated macrophages in the failing heart  
47 marked by CD206 and CD163 expression, with predominance of a subpopulation  
48 expressing IL-4R $\alpha$  and Fizz3, the human homolog of *Fizz1*.

49 *What are the clinical implications?*

- 50 • An expanded pool of alternatively activated CD206<sup>+</sup>IL-4R $\alpha$ <sup>+</sup> cardiac macrophages are key  
51 drivers of LV remodeling in heart failure, inducing an immuno-fibrotic and para-  
52 inflammatory response in part dependent on FIZZ1.
- 53 • Targeting IL-4 signaling in CD206<sup>+</sup> macrophages represents a potential therapeutic  
54 approach to limit long-term cardiac remodeling in heart failure.

## 55 INTRODUCTION

56 Heart failure (HF) is characterized by local and systemic inflammation.<sup>1</sup> In ischemic  
57 cardiomyopathy, activated macrophages expand in the failing myocardium and contribute to  
58 tissue injury and adverse left ventricular (LV) remodeling.<sup>1-5</sup> Cardiac macrophages may be  
59 classified as C-C motif chemokine receptor (CCR2)<sup>-</sup> resident macrophages that are  
60 embryonically derived and maintained independent of blood monocytes, and CCR2<sup>+</sup>  
61 macrophages that are derived from monocyte recruitment.<sup>6-8</sup> Acutely after myocardial infarction  
62 (MI), resident CCR2<sup>-</sup> macrophages are lost and replaced by Ly6C<sup>hi</sup>CCR2<sup>+</sup> monocytes and  
63 inflammatory CCR2<sup>+</sup> macrophages that later transition to reparative macrophages to facilitate  
64 wound healing, accompanied by attendant proliferation of surviving resident macrophage  
65 populations.<sup>3,6,9-11</sup> Notably, in chronic ischemic cardiomyopathy, well after MI healing, the  
66 expanded cardiac macrophage pool stems from both locally proliferating resident macrophages  
67 and recruited CCR2<sup>+</sup> monocytes,<sup>2,3,5,6,12</sup> with overall predominance of locally sourced (CCR2<sup>-</sup>)  
68 cells.<sup>3,5,12</sup> CCR2<sup>+</sup> macrophage abundance correlates with adverse LV remodeling in human  
69 HF,<sup>2</sup> whereas inhibiting CCR2<sup>+</sup> monocyte infiltration sub-acutely after MI improves LV  
70 remodeling in mice,<sup>5</sup> identifying CCR2 as a potential therapeutic target. In contrast, the roles of  
71 locally sourced macrophage populations in the pathogenesis of LV remodeling in established  
72 HF are poorly defined.

73 Resident cardiac macrophages express several marker genes including *Timd4*, *Lyve1*,  
74 and classical alternatively-activated (M2-like) macrophage markers *Cd163* and *Mrc1*.<sup>2,6,13,14</sup> In  
75 the naïve mouse heart, CD206 (*Mrc1*)-expressing resident macrophages are primarily CCR2<sup>-</sup>  
76 and express high levels of the markers *Ym1* and *Fizz1*.<sup>15</sup> After acute MI, CD206<sup>+</sup> macrophages  
77 expand in the infarct and border zone (peaking at 7 d post-MI)<sup>15,16</sup> to promote wound healing  
78 and limit adverse remodeling.<sup>15,17</sup> CD206<sup>+</sup> macrophages are activated by Th2 cytokines IL-4/13,  
79 and IL-10.<sup>18-20</sup> IL-4/13 are important inducers of a reparative and pro-fibrotic phenotype,<sup>18,19,21</sup>  
80 signaling through Type I or II IL-4 receptors containing the common alpha chain IL4R $\alpha$ , resulting

81 in STAT6-mediated activation of *Arg1*, *Mrc1*, *Fizz1* (*Retnla*), *Ym1*, and secretion of C-C motif  
82 chemokine ligands (CCL)-17 and -22.<sup>18,20,22,23</sup> In vivo administration of IL-4 acutely after MI  
83 improves wound healing and remodeling via the modulation of CD206<sup>+</sup> macrophages. However,  
84 this beneficial effect is lost when IL-4 is given late after MI.<sup>15,24</sup>

85 These prior studies highlight CD206<sup>+</sup> macrophages as key mediators of the post-MI  
86 wound healing response. However, the importance of this macrophage population in the  
87 chronically failing heart, which exhibits a considerably different immune cell profile,<sup>1,11</sup> is  
88 unknown. In chronic ischemic cardiomyopathy, locally sourced and proliferating cardiac  
89 macrophages exhibit much greater *Mrc1* and *Fizz1* expression than monocyte-derived  
90 macrophages.<sup>5</sup> Moreover, in chronic pulmonary and renal disease, persistent M[IL-4/13]  
91 activation or M2-like macrophage recruitment can contribute to tissue fibrosis,<sup>21,25</sup> whereas we  
92 have previously shown that the post-MI failing heart exhibits increased IL-4/13 expression  
93 coincident with a Th2 CD4<sup>+</sup> T-cell profile.<sup>26</sup> Hence, here we tested the hypothesis that  
94 expansion of cardiac CD206<sup>+</sup> macrophages, activated by IL-4 receptor signaling, are key  
95 mediators of LV remodeling in chronic ischemic HF.

## 96 **METHODS**

97 **Mouse models.** All mouse studies complied with the National Research Council's Guide  
98 for the Care and Use of Laboratory Animals (revised 2011) and were locally approved by  
99 Institutional Animal Care and Use Committees at the University of Alabama at Birmingham and  
100 Washington University in St. Louis. CD45.2 (#000664) and CD45.1 (#002014) C57BL/6 mice,  
101 *Fizz1*<sup>-/-</sup> mice (#029976), and LysM-Cre<sup>ERT2</sup> mice (#031674) were purchased from Jackson  
102 Laboratory. Floxed IL4R $\alpha$  (IL4R $\alpha$ <sup>ff</sup>) mice<sup>27</sup> were originally obtained from Dr. Frank Brombacher  
103 (University of Cape Town) and bred with LysM-Cre<sup>ERT2</sup> mice to generate IL-4R $\alpha$ <sup>ff</sup>LysM-Cre<sup>ERT2</sup>  
104 mice that allow for tamoxifen-inducible myeloid-specific deletion of IL-4R $\alpha$ . To induce Cre-  
105 mediated recombination, mice were fed tamoxifen citrate chow (40 mg/kg/d; Inotiv TD.130860).

106 As 400mg/kg tamoxifen citrate is sufficient to induce recombination,<sup>28</sup> IL-4R $\alpha$ <sup>ff</sup>LysM-Cre<sup>ERT2</sup>  
107 mice were considered to reach stable myeloid-specific IL4R $\alpha$  deletion after 2 w of feeding. Male  
108 mice were used for experiments unless otherwise indicated. Mice were housed in temperature-  
109 controlled cages under a 12-hour light-dark cycle and given free access to water and regular  
110 chow. A total of 248 male and 37 female mice at 8-10 weeks of age were used. After terminal  
111 experiments, mice were euthanized by isoflurane inhalation (2%).

112 **Murine surgical procedures.** Permanent coronary ligation to induce large MI and  
113 ischemic HF, and control sham surgery, were performed under general anesthesia with 1-1.5%  
114 inhaled isoflurane and mechanical ventilation as previously described.<sup>4,26,29-31</sup> For macrophage  
115 adoptive transfer, cell suspensions ( $1 \times 10^6$  polarized macrophages in 50  $\mu$ L sterile PBS) or  
116 sterile PBS control alone were injected intramyocardially into the free wall of left ventricle (10  
117  $\mu$ L/site x 5 sites) in naïve C57BL/6 male recipient mice.

118 **Echocardiography.** M-mode and 2-dimensional echocardiography were performed  
119 under 2% inhaled isoflurane anesthesia (with 98% O<sub>2</sub>) and continuous ECG monitoring using a  
120 VisualSonics Vevo 3100 High-Resolution System and 30 MHz MX400 transducer with a heated,  
121 bench-mounted adjustable rail system.<sup>4,26,29,32,33</sup> Imaging was performed in the parasternal long-  
122 axis and short-axis views. LV chamber volume in end-diastole (EDV) and end-systole (ESV)  
123 were quantitated using the area-length method from long-axis images captured in ECG-gated  
124 Kilohertz Visualization mode. Systolic function was indexed by LV ejection fraction (EF),  
125 calculated as  $[(EDV-ESV)/EDV] * 100$ . Stroke volume was defined as EDV-ESV. LV mass (mg)  
126 was calculated as  $1.05 * [(IVSWTd+EDD+PWTd)^3 - (EDD)^3]$ , where IVSWTd and PWTd are  
127 interventricular septal and LV posterior wall thickness at end-diastole, and EDD is the LV end-  
128 diastolic diameter derived from M-mode tracings.

129 **Gene expression analysis.** Total RNA from LV remote zones ( $\approx 10$  mg), macrophages  
130 and cMSCs was extracted using Trizol (Invitrogen, 15596026) and Qiagen RNeasy Columns



131 (QIAGEN, 74204)<sup>34</sup> and reverse transcribed to cDNA using the High-Capacity cDNA Reverse  
132 Transcription Kit (Applied Biosystems, 43-688-14). cDNAs were subjected to qPCR using SYBR  
133 Green Master Mix (Applied Biosystems, A25742) and run on a ViiA 7 RT PCR System (Applied  
134 Biosystems).<sup>32,35-37</sup> Forward and reverse primer sequences are listed in *Supplemental Table 1*.

135 **Multiplex Luminex assay.** Peripheral blood was coagulated on ice and centrifuged to  
136 separate serum. Cytokine Luminex assay of serum samples was performed in 96-well Bio-Plex  
137 Pro Mouse Cytokine microplates and analyzed using the Luminex reader (BIO-RAD, Bio-  
138 Plex™ 200 system) according to the manufacturer's protocol.<sup>34</sup> Bio-Plex Pro Mouse Cytokine  
139 23-plex Assay (M60009RDPD), MIP-2 Set (171G6006M), TGF-β1 Set (171V4001M), Standards  
140 Group I (171I50001), Group II Standards (171I60001), TGF-β Standard (171X40001) and  
141 Reagent Kit V (12002798) were all purchased from BIO-RAD.

142 **Immunoblot analysis.** Immunoblotting was conducted using standard protocols as  
143 described previously,<sup>33,34,36</sup> using antibodies against mouse Notch1 (Cell Signaling, 4380), NICD  
144 (Cell Signaling, 4147) and α-SMA (Abcam, ab7817). GAPDH (Cell Signaling, 97166) and α-  
145 tubulin (Santa Cruz, 5286) were used as loading controls.

146 **Immune cell isolation and flow cytometry.** Live mononuclear cells were isolated from  
147 peripheral blood and heart tissue and processed for flow cytometry as previously  
148 described.<sup>26,29,38</sup> After 1% paraformaldehyde fixation, isolated cells were resuspended in MACS  
149 buffer (PBS with 2 mM EDTA and 0.5% BSA) and preincubated for 10 min at 4°C with anti-  
150 mouse CD16/CD32 antibody (eBioscience, #14-0161-82) to block Fcγ receptors.<sup>32</sup> Cells were  
151 then stained for surface membrane markers upon incubation with fluorophore-labeled anti-  
152 mouse CD45, F4/80, MERTK, CD11b, Ly6G, Ly6C, CD3, CD4, CD8, IL-4Rα, IL-10Rα, MHCII,  
153 LYVE1, and CCR2, and, for human cardiac mononuclear cells, anti-human CD45, CD64,  
154 CD206 and CCR2 for 1 h. Mouse cardiac mononuclear cells were then permeabilized with 0.5%  
155 Tween-20 for 20 minutes, followed by staining with anti-mouse CD206 and Ki67 for 1 h. All

156 staining was performed on ice to maintain cell morphology. Flow cytometry was performed  
157 using a FACSDiva LSR-II flow cytometer (BD) and analyzed using FlowJo software v10.8.0.  
158 Specific details regarding the fluorophore-conjugated antibodies used are listed in *Supplemental*  
159 *Table 2*.

160 **(Immuno)histological analysis.** Formalin-fixed, paraffin-embedded heart tissues were  
161 sectioned at 5  $\mu\text{m}$  thickness, deparaffinized, and rehydrated. Cardiomyocyte cell membranes  
162 and capillaries were stained using Alexa Fluor (AF)555-conjugated wheat-germ agglutinin  
163 (Invitrogen, #W32464) and AF488-conjugated isolectin-IB<sub>4</sub> (Invitrogen, #121411),  
164 respectively.<sup>4,26,29,32</sup> After antigen retrieval, LV sections were stained with anti-mouse CD206  
165 (1:50, R&D AF2535, secondary anti-goat AF555), Ki67 (1:50, eBioscience 14-5698-82,  
166 secondary anti-rat AF488), CD45.2 (1:50, eBioscience 14-0454-82, secondary anti-mouse  
167 AF647),  $\alpha$ -actinin (1:100, Sigma A2172, secondary anti-mouse AF555), IL-4R $\alpha$  (1:50, Invitrogen  
168 PA5-103142, secondary anti-rabbit AFF647) and FIZZ1 (1:50, R&D MAB-1523, secondary anti-  
169 rat AF488) or anti-human CD163 (1:100, Leica Biosystems CD163-L-CE, secondary anti-mouse  
170 IgG1 AF647), IL-4R $\alpha$  (1:50, R&D MAB230, secondary anti-mouse IgG2a AF488) and FIZZ3  
171 (1:50, R&D AF1359, secondary anti-goat AF555) antibodies. After permeabilization with 20  
172  $\mu\text{g/ml}$  proteinase K,  $\alpha$ -actinin stained LV sections were incubated with TUNEL reaction mix  
173 (Biotium 30063) for 2h at 37°C. CD206 or CD163 stained LV sections were incubated with 15  
174  $\mu\text{M}$  heat-dissociated collagen hybridizing peptide 5-FAM Conjugate (F-CHP) (3Hekix FLU300)  
175 overnight at 4°C. In addition, LV frozen sections (8  $\mu\text{m}$ ) were fixed with acetone/chloroform,  
176 rehydrated, and stained with anti-mouse F4/80 (1:100, Abcam ab6640, secondary anti-rat  
177 AF488) and  $\alpha$ -actinin (1:100, Sigma A2172, secondary anti-mouse AF555) antibodies. Nuclei  
178 were stained with DAPI. Images were acquired using a Nikon A1 confocal microscope. Fibrosis  
179 was measured in LV sections using Masson's Trichrome staining, and images were captured by  
180 a Nikon 80i Nomarski DIC microscope. Collagen (blue) staining percent of total cross-sectional

181 area was determined as previously described.<sup>4,26,29,32</sup> Staining was quantified from more than 5  
182 high-power fields (40x) per section using Nikon NIS-Elements software, version 4.60.00.

183 **Bone marrow macrophage culture and adoptive cell transfer.** C57BL/6 (CD45.2) or  
184 *Fizz1*<sup>-/-</sup> mouse bone marrow (BM) cells were harvested aseptically and cultured in RPMI 1640  
185 medium, supplemented with 10% fetal bovine serum (FBS), 1% penicillin-streptomycin (PS) and  
186 30 ng/mL recombinant mouse macrophage-colony-stimulating factor (M-CSF, R&D, 416-ML) at  
187 37°C. The supernatant was replaced with fresh complete medium containing 30 ng/mL M-CSF  
188 every 3 days for the attached cells, following the protocol of Trouplin et al.<sup>39</sup> After 7 days of  
189 differentiation, BM-derived macrophages (BMDMs) were cultured in RPMI 1640 with 10% FBS  
190 and 1% PS for 24 h for M0 (resting) macrophages, with 40 ng/mL recombinant mouse IL-4  
191 (R&D, 404-ML) for M[IL-4] macrophages, and with 40 ng/mL recombinant mouse IL-10 (R&D,  
192 417-ML) for M[IL-10] macrophages. Polarized macrophages were then mechanically detached,  
193 and cell aliquots were stained with anti-mouse CD45, F4/80 and CD206 (*Supplemental Table 2*)  
194 and analyzed using a flow cytometer to evaluate macrophage purity. After 24 h of polarization,  
195 M0, M[IL-4] and M[IL-10] cells were rinsed with PBS and cultured in FBS-free medium for 3 h.  
196 The macrophage conditioned medium was subsequently collected for treatment of cardiac  
197 mesenchymal stem cells and fibroblasts, as described below. The polarized macrophages were  
198 used for studies of intramyocardial adoptive cell transfer into naïve male CD45.1 C57BL/6 mice  
199 as described above.

200 ***In vivo* antisense oligonucleotide administration.** Second-generation chimeric 20-  
201 base IL-4R $\alpha$  antisense oligonucleotides (ASOs) (CCGCTGTTCTCAGGTGACAT) and control  
202 mismatched oligonucleotides (MM oligos) (CCGCTCATCACTGCTGACAT) were synthesized by  
203 Integrated DNA Technologies (IDT). All 20-base oligonucleotides were designed to avoid  
204 murine immune-stimulatory motifs, and contained phosphorothioate backbones and 2'-O-  
205 methoxyethylribose (MOE)-modification on bases 1–5 and 16–20 as described previously.<sup>40,41</sup>  
206 Oligonucleotides were suspended in sterile saline and administered every 3 days (40 mg/kg,

207 total volume 10  $\mu$ L saline/g body weight) by intraperitoneal injection.<sup>41</sup> Male C57BL/6 sham-  
208 operated and HF mice (4 w post-MI) with comparable degrees of LV remodeling were  
209 randomized to receive either IL-4R $\alpha$  ASOs (Ref 219428745, IDT) or MM oligos (Ref 219428746,  
210 IDT) for 4 w.

211 ***In vivo* phagocytosis assay.** To assess cardiac macrophage phagocytosis *in vivo*,  
212 pHrodo™ green-E. coli bioparticles (Invitrogen, P35366) were injected intraperitoneally to mice  
213 (200  $\mu$ g/mouse) 4 h before sacrifice. After sacrifice, heart mononuclear cells were collected and  
214 cell surface marker staining performed with anti-mouse CD45, F4/80, MERTK and CD206 as  
215 described above. Bioparticle uptake in live macrophages was measured by flow cytometry.

216 **Cardiac mesenchymal stem cell (cMSC) studies *in vitro*.** Sca1<sup>+</sup>CD90<sup>+</sup>CD31<sup>-</sup>DDR2<sup>-</sup>  
217 cMSCs were isolated from mouse hearts and maintained in supplemented [DMEM]/Ham's F-12  
218 culture medium as previously described,<sup>33</sup> and used within 3-5 cell passages for all experiments.  
219 For isolated cell stimulation studies, cMSCs were treated at the indicated times with serum-free  
220 conditioned RPMI 1640 medium from M0, M[IL-4], or M[IL-10] macrophages described above  
221 (or control media alone), with some experiments performed in the presence of either 1.5  $\mu$ g/mL  
222 Fizz1 neutralization antibody or IgG isotype control (antibodies-online.com, ABIN636644 and  
223 ABIN1881001, respectively). In separate studies, cMSCs were treated with recombinant mouse  
224 Fizz1 (Leinco Technologies, R1140) at the indicated concentrations and times in serum-free  
225 RPMI 1640 medium.

226 **Collagen gel-contraction assays.** These were performed as previously described.<sup>33</sup>  
227 Briefly, cMSCs in ice-cold 10% FBS DMEM medium mixed with 1 mg/mL rat tail collagen I were  
228 plated in 48-well tissue culture plates at a density of  $3 \times 10^5$  cells/well. The cell suspension was  
229 incubated at 37°C for 30 minutes until gelation. After gel formation, an additional 0.5 mL of 10%  
230 FBS DMEM medium was added to each well and incubated overnight at 37°C in a 5% CO<sub>2</sub>  
231 incubator. The supernatant was then removed and the gels treated with 0.5 mL conditioned

232 RPMI 1640 medium from M0, M[IL-4], or M[IL-10] macrophages with 10% FBS (or media alone  
233 control), with or without anti-Fizz1 or IgG isotype control (1.5  $\mu$ g/mL), as described above. Some  
234 experiments were performed upon incubation with IL-4 or IL-10 alone (40 ng/mL) in 10% FBS  
235 RPMI 1640 medium. The cells were cultured and treated for 5 d with medium change every 2 d.  
236 On day 5, the gels were detached from the wells using a pipette tip and incubated overnight. On  
237 day 6, the gels were imaged with a digital camera and gel area was measured using Image J  
238 software (1.51j8, NIH).

239 **siRNA transfection of cMSCs.** cMSCs were transfected with siRNA using INTERFERin  
240 Reagent (Polyplus, 101000028) according to the manufacturer's protocol. Control siRNA  
241 (4390843) and siRNA targeting Notch1 (4390771) were purchased from Invitrogen.

242 **Cardiac fibroblast studies *in vitro*.** Mouse cardiac fibroblasts were purchased from  
243 iXCells biotechnologies (10MU-015) and grown in fibroblast growth medium (MD-0011) at 37°C  
244 in a humidified 5% CO<sub>2</sub> atmosphere. Cells were used within 1-3 passages and treated with M0,  
245 M[IL-4], or M[IL-10] conditioned medium for 24 h.

246 **Human studies.** Following patient consent, failing heart tissue was procured from  
247 patients with advanced (NYHA IV) HF with reduced EF undergoing LV assist device (LVAD)  
248 placement at the University of Alabama at Birmingham (UAB) under the auspices of Institutional  
249 Review Board (IRB) approved protocol #X090810003. Non-failing control heart tissues were  
250 obtained from donor hearts technically unsuitable for heart transplantation from the Alabama  
251 Organ Center. All protocols using human heart samples were approved by the UAB IRB. Failing  
252 and control human heart tissues were used for cardiac immune cell isolation and subsequent  
253 flow cytometry, as well for histological analysis. Clinical characteristics of human HF subjects  
254 and donor controls are shown in [Supplemental Table 3](#).

255 **Statistical Analysis.** All group data are mean  $\pm$  SD. All statistical analyses were  
256 performed with GraphPad Prism 9 (GraphPad Software). Normality was assessed using the  
257 Shapiro-Wilk test, whereas group variances were compared using the Brown-Forsythe test. For

258 normally distributed data, a two-tailed unpaired Student's *t* test with equal or unequal variance  
259 was used for two-group analyses, and 1- or 2-way ANOVA with Tukey's post-test was used for  
260 multi-group analyses. Additionally, 2-way repeated-measures ANOVA with Dunnett's multiple  
261 comparison test was used to analyze time series pre-post data. For non-normal distributions,  
262 the Mann-Whitney U test was used for 2-group analyses. Pearson R correlation test was used  
263 for linear dependence analyses. Specific approaches are in the figure legends. A *p* value  
264 of <0.05 was considered statistically significant.

## 265 RESULTS

266 **Cardiac CD206<sup>+</sup> macrophages progressively expand during the development of**  
267 **chronic HF post-MI.** Cardiac macrophage subsets were profiled using flow cytometry at  
268 various timepoints following non-reperfused large MI during the development of ischemic  
269 HF,<sup>4,26,29,36</sup> and in sham-operated controls (*Figure 1A*). As shown in *Figures 1B-C and S1A*,  
270 following MI there was significant cardiac accumulation of both overall CD45<sup>+</sup> leukocytes and  
271 total F4/80<sup>+</sup>MERTK<sup>+</sup> macrophages in a biphasic manner, with high levels at 48 h after injury,  
272 subsequent decline by 2 w, followed by a second phase of re-expansion up to 8 w post-MI  
273 during chronic LV remodeling and failure. In the failing heart 8 w post-MI, macrophages  
274 comprised nearly two-thirds (~63%, or ~140,000 cells per heart) of all cardiac leukocytes and  
275 were increased by ~9-fold over macrophage levels in sham-operated hearts. Similar dynamics  
276 were observed for the blood levels of pro-inflammatory Ly6C<sup>high</sup> monocytes, an important source  
277 of infiltrating macrophages,<sup>3,5,10,32,42</sup> during the progression of ischemic HF. No significant  
278 differences were observed in the levels of patrolling Ly6C<sup>low</sup> monocytes between sham-operated  
279 and HF mice at any time point evaluated (*Figures S2A-C*).

280 We next further evaluated macrophage subsets in the mouse heart. Naïve murine hearts  
281 harbored low numbers of macrophages (~20,000/heart), of which ~90% expressed the resident  
282 macrophage marker CD206 (*Figure 1C*). However, acutely (48 h) after MI, CD206<sup>+</sup>  
283 macrophages comprised only ~20% of overall macrophages in the heart, in the setting of a

284 marked expansion of CD206<sup>-</sup> macrophages early after MI. Thereafter, both the frequency and  
285 absolute number of CD206<sup>+</sup> macrophages steadily increased in post-MI hearts during the  
286 progression of LV remodeling, such that at 8 w post-MI ~85% of cardiac macrophages  
287 expressed CD206. In contrast, CD206<sup>-</sup> macrophage levels decreased markedly by 2 w post-MI,  
288 and then exhibited smaller sustained increases in chronically failing hearts thereafter. Both  
289 populations were significantly increased as compared to sham-operated hearts at all timepoints  
290 post-MI. Hence, macrophages expand significantly in the chronically remodeled and failing heart  
291 post-MI, and most of these macrophages express CD206.

292 **Cardiac CD206<sup>+</sup> macrophages robustly express IL-4R $\alpha$  in chronic HF.** Two key  
293 activators of CD206<sup>+</sup> macrophages are IL-4/13, acting via Type I or II IL-4 receptors (IL-4R)  
294 containing the common subunit IL4R $\alpha$ ,<sup>43-45</sup> and IL-10, signaling through the IL-10 receptor (IL-  
295 10R) complex upon binding to the high affinity IL-10R $\alpha$  (IL-R1) subunit.<sup>46,47</sup> As illustrated in  
296 Figure 1D, both CD206<sup>+</sup>IL4R $\alpha$ <sup>+</sup> and CD206<sup>+</sup>IL-10R $\alpha$ <sup>+</sup> macrophage subpopulations were  
297 significantly increased in comparison to sham-operated hearts at all time points after MI.  
298 However, there was substantial expansion of the CD206<sup>+</sup>IL4R $\alpha$ <sup>+</sup> population over time, such that  
299 at 8 w post-MI, levels of CD206<sup>+</sup>IL-4R $\alpha$ <sup>+</sup> cells (~45,000 per heart) were ~8-fold higher than  
300 CD206<sup>+</sup>IL-10R $\alpha$ <sup>+</sup> cells and comprised ~42% of all CD206<sup>+</sup> macrophages in the chronically failing  
301 heart. In contrast, at 1 w post-MI, during the healing phase, CD206<sup>+</sup>IL-10R $\alpha$ <sup>+</sup> macrophages  
302 were more abundant than CD206<sup>+</sup>IL-4R $\alpha$ <sup>+</sup> cells, comprising ~40% of all CD206<sup>+</sup> macrophages  
303 in the heart. Notably, neither IL-4R $\alpha$  nor IL-10R $\alpha$  were abundantly expressed by cardiac  
304 CD206<sup>-</sup> macrophages (<3% of cells) at any timepoint post-MI, and CD206<sup>-</sup> macrophages  
305 expressing either IL-4R $\alpha$  or IL-10R $\alpha$  numbered fewer than 500 cells/heart in the chronic stages  
306 of LV remodeling (Figure S1B). In addition, IL-4R $\alpha$  and IL-10R $\alpha$  expression was also very low in  
307 blood neutrophils (<1.5%), Ly6C<sup>low</sup> monocytes (<2%) and Ly6C<sup>high</sup> monocytes (<5%) in both  
308 sham and HF mice (Figure S2).



309           Regarding Th2 cytokines, serum levels of IL4 and IL-10 were significantly higher in MI  
310 mice as compared with sham mice during both the healing phase (1 w) and chronic remodeling  
311 phase (8 w) post-MI, whereas levels of IL-13 and TGF- $\beta$ 1 were comparable in sham and MI  
312 mice at all timepoints (*Figure S3A*). In contrast, serum levels of the pro-inflammatory cytokines  
313 TNF- $\alpha$ , IFN- $\gamma$ , IL-1 $\beta$ , MCP-1 and MIP-2 $\alpha$  in HF mice were increased over sham controls during  
314 both the early and late phases of remodeling after MI (*Figure S3B*), consistent with ongoing  
315 systemic inflammation in HF mice. Hence, CD206<sup>+</sup> macrophages in the failing heart primarily  
316 express IL-4R $\alpha$  (versus IL-10R $\alpha$ ); this is accompanied by increased circulating levels of both IL-  
317 4 and IL-10.

318           **CD206<sup>+</sup> macrophages in the failing heart proliferate, are primarily CCR2<sup>-</sup>, MHCII<sup>hi</sup>,**  
319 **and LYVE1<sup>+</sup> and correlate with LV dysfunction and fibrosis.** At 8 w post-MI, HF mice  
320 exhibited significant LV systolic dysfunction and fibrosis (*Figure 2A and S4A*). Cardiac CD206<sup>+</sup>  
321 macrophage abundance inversely correlated with LVEF ( $r = 0.695$ ), and directly correlated with  
322 border and remote zone fibrosis ( $r = 0.755$  and  $0.644$ , respectively). Tissue co-staining with anti-  
323 CD206 and fluorescein-conjugated collagen hybridizing peptide (CHP) that recognizes  
324 denatured collagen<sup>48</sup> revealed that CD206<sup>+</sup> macrophages were primarily found in areas of  
325 collagen turnover in the failing heart, with >98% of macrophages associated with CHP-positive  
326 regions in the infarct and border zones, and >80% CHP-associated cells in the remote  
327 myocardium (*Figure 2B*). To infer the source of CD206<sup>+</sup> macrophage expansion in the failing  
328 heart, we measured the expression of markers CCR2, MHCII, and LYVE1 by flow cytometry  
329 (*Figure 2C*). In sham hearts, >90% CD206<sup>+</sup> macrophages were CCR2<sup>-</sup>, and of these, ~95%  
330 were LYVE-1<sup>+</sup>, indicating a primarily resident macrophage population. In failing hearts, the  
331 proportion of CD206<sup>+</sup>CCR2<sup>-</sup>LYVE1<sup>+</sup> macrophages decreased significantly but remained high at  
332 ~80% of total CD206<sup>+</sup> cells, suggesting resident cell predominance but with an increased



333 contribution from monocyte-derived macrophages. Moreover, in both sham and failing hearts,  
334 the majority (~70%) of CD206<sup>+</sup> macrophages were MHCII<sup>hi</sup>.

335 Resident macrophage expansion requires local cell proliferation. As shown in Figure 2D  
336 and S4B, immunostaining for CD206 and the cell proliferation marker Ki67 revealed that both  
337 total CD206<sup>+</sup> and Ki67<sup>+</sup>CD206<sup>+</sup> macrophages were robustly expanded in the failing heart (8 w  
338 post-MI) as compared to sham. Cell density was greatest in the infarct zone (855 cells/mm<sup>2</sup>; 9%  
339 Ki67<sup>+</sup>), followed by the border zone (584 cells/mm<sup>2</sup>; ~8% Ki67<sup>+</sup>) and then the remote zone (290  
340 cells/mm<sup>2</sup>, Ki67 positivity ~3% similar to sham hearts). Complementary assessment using flow  
341 cytometry demonstrated that in both sham and failing hearts only CD206<sup>+</sup> macrophages  
342 exhibited Ki67 positivity (Figure 2E). Moreover, as compared to sham, failing hearts evidenced  
343 ~3-fold higher levels of CD206<sup>+</sup>Ki67<sup>+</sup> macrophages (~10% total), confirming augmented local  
344 proliferation of CD206<sup>+</sup> macrophages. In parallel, myocardial gene expression of Th2 cytokines  
345 IL-4 and IL-10 (but not IL-13) and classical alternatively-activated macrophage markers *Mrc1*  
346 (*CD206*), *Arg1*, *Ym1* and *Fizz1* was significantly increased in failing versus sham hearts (Figure  
347 S4C). Concomitantly, the expression of fibrotic genes (*Col1α1*, *Col1α2*, and *Col3α1*) was  
348 markedly increased in failing hearts. Collectively, these data support expansion of a Th2/M2-like  
349 immuno-fibrotic response in the chronically failing heart post-MI.

#### 350 **IL-4 polarization *in vitro* induces a profibrotic phenotype in CD206<sup>+</sup> macrophages.**

351 Bone marrow-derived macrophages (BMDMs) were polarized with either IL-4 or IL-10  
352 (40ng/mL), or medium alone (M0 control), for 24 h (Figure 3A). Flow cytometry indicated that  
353 while BMDMs were primarily CD206<sup>+</sup> under resting (M0) conditions, both IL-4 and IL-10  
354 exposure augmented BMDM CD206 expression to ~98-99% of total cells. As shown in Figure  
355 3B, the expression of signature M2 genes<sup>15,18,20,49,50</sup> *Mrc1*, *Arg1*, and *Ym1* significantly increased  
356 in both M[IL-4] and M[IL-10] macrophages (with much more *Arg1* and *Ym1* expression in M[IL-4]  
357 cells) as compared to non-polarized M0 macrophages. In contrast, expression of *Fizz1* (found in  
358 inflammatory zone 1), a protein secreted during Th2 responses<sup>51,52</sup> and implicated in

359 myofibroblast differentiation and lung fibrosis,<sup>53,54</sup> only increased in M[IL-4] macrophages, and to  
360 extraordinary levels (>7,500-fold). Conversely, *B7-H4* was exclusively, albeit modestly,  
361 upregulated in M[IL-10] macrophages. Changes in macrophage gene expression were noted  
362 after 4 h of polarization (Figure S5A) and were maintained or augmented after 48 h (Figure  
363 S5B). A range of responses was observed for inflammatory and repair-associated genes in  
364 BMDMs after 24 h of polarization *in vitro* (Figure S6A). Surprisingly, there was no upregulation  
365 of profibrotic genes TGF- $\beta$ 1 and platelet-derived growth factor (PDGF)-BB in M[IL-4] and M[IL10]  
366 macrophages as compared to M0 cells, although there was augmented expression of tissue  
367 inhibitor of matrix metalloproteinase (TIMP)-1 and TIMP-3 in both M[IL-4] and M[IL-10]  
368 macrophages.

369 In parallel experiments, conditioned medium was collected from M0, M[IL-4] and M[IL-10]  
370 macrophages and applied to Sca1<sup>+</sup>CD90<sup>+</sup>CD31<sup>-</sup>DDR2<sup>-</sup> cardiac MSCs<sup>33</sup> (Figure 3A). cMSC  
371 gene expression was then evaluated after 6 and 16 h of exposure. Short-term (6 h) exposure to  
372 M[IL-4] medium induced significant upregulation of the proliferation genes *PCNA*, *Mki67*,  
373 *CyclinB1* and *CyclinD1* as compared to M0-medium, and to a greater extent than upon  
374 exposure to M[IL-10] medium. Longer-term (16 h) exposure induced similar expression  
375 responses for cMSC pro-fibrotic genes, including  $\alpha$ -smooth muscle actin ( *$\alpha$ -SMA*), *Col1 $\alpha$ 1*,  
376 *Col1 $\alpha$ 2*, and *Col3 $\alpha$ 1* (Figure 3C). The functional impact of macrophage polarization on cMSCs  
377 was assessed using collagen gel contraction assays<sup>33</sup> after 5 d of exposure to M0, M[IL-4],  
378 M[IL-10] medium, or medium alone control. As illustrated in Figure 3D, M[IL-4] medium  
379 exposure induced robust gel contraction, significantly greater than with exposure to either M0 or  
380 M[IL-10] medium (or control), consistent with vigorous cMSC myofibroblast differentiation.  
381 Importantly, exposure to complete medium containing IL-4 or IL-10 alone (40 ng/mL) did not  
382 induce cMSC gel contraction (Figure S6B), indicating an indispensable role for CD206<sup>+</sup>  
383 macrophages in IL-4-induced cMSC myofibroblast differentiation. Similarly, 24 h treatment with

384 M[IL-4] medium robustly increased  $\alpha$ -SMA protein expression in mouse cardiac fibroblasts as  
385 compared with similar treatment with M0 or M[IL-10] medium (*Figure S6C*). Collectively, these  
386 data suggest that IL-4-mediated macrophage polarization supports pro-fibrotic responses in  
387 concert with striking upregulation of *Fizz1*.

388 **Adoptive transfer of M[IL-4] macrophages to naïve hearts induces cardiac**  
389 **dysfunction and fibrosis.** To evaluate the in vivo cardiac effects of M[IL-4] and M[IL-10]  
390 macrophages, we adoptively transferred  $1 \times 10^6$  M0, M[IL-4], or M[IL-10] bone marrow-derived  
391 macrophages from CD45.2 male mice to naïve WT CD45.1 male mice (PBS control) via  
392 intramyocardial injection, with subsequent follow-up over 4 w (*Figure 4A*). Immunostaining of  
393 injection sites of recipient hearts 30 minutes post-injection confirmed successful transfer of M0,  
394 M[IL-4], and M[IL-10] donor macrophages (*Figure S7A*). Serial echocardiography of recipient  
395 mice revealed progressive and significant LV chamber dilatation, with increased EDV and ESV,  
396 and systolic dysfunction, with reduced LVEF, along with LV hypertrophy, evidenced by  
397 increased LV mass, IVSWTd, and PWTd by echocardiography and increased normalized heart  
398 weight, in M[IL-4] macrophage recipients, but not in PBS, or M0 or M[IL-10] macrophage  
399 recipients (*Figures 4B and S7B and D*). Stroke volume was comparable over time in all four  
400 groups (*Figure S7C*). Histological analysis showed significantly increased patchy interstitial  
401 fibrosis in M[IL-4]-recipient hearts as compared with PBS, M0, and M[IL-10] recipient hearts  
402 (*Figure 4C*), along with augmented cardiomyocyte cross-sectional area and apoptosis (*Figures*  
403 *4D and S7E*). Importantly, CD45.2 and CD206 co-staining of recipient hearts demonstrated  
404 donor macrophage persistence in adoptive transfer recipients, but to a significantly greater level  
405 in M[IL-4] recipient mice. M[IL-4] (but not M0 or M[IL-10]) macrophage transfer also induced  
406 expansion of native resident CD206<sup>+</sup> macrophages. Both CD45.2<sup>+</sup> donor and CD45.2<sup>-</sup> recipient  
407 CD206<sup>+</sup> macrophages expansion occurred primarily at sites of collagen turnover and fibrosis in  
408 recipient hearts, with stronger such association for donor macrophages (*Figures 4E and S7F*),

409 There was no evidence of pro-inflammatory Ly6C<sup>hi</sup> monocytosis in any recipient mouse group  
410 (*Figure S7G*), suggesting the absence of systemic inflammation after transfer. Collectively,  
411 these data establish that M[IL-4] polarized macrophages are sufficient to induce chronic cardiac  
412 remodeling, hypertrophy, and fibrosis, and a microenvironment supporting CD206<sup>+</sup> macrophage  
413 expansion.

414 **Myeloid-specific IL-4R $\alpha$  deletion in HF suppresses cardiac CD206<sup>+</sup> macrophage**

415 **expansion and improves LV remodeling.** Among myeloid cells, IL-4R $\alpha$  expressions occurred  
416 primarily in macrophages, with low levels in monocytes and neutrophils (*Figure S2*), and among  
417 macrophages, primarily in CD206<sup>+</sup> macrophages (*Figures 1D and S1B*). Hence, to establish the  
418 role of CD206<sup>+</sup>IL4R $\alpha$ <sup>+</sup> macrophages in HF, we used IL-4R $\alpha$ <sup>ff</sup>LysM-Cre<sup>ERT2</sup> mice. Given the  
419 importance of the IL-4 axis in wound healing after acute MI<sup>15,24</sup> and our observations that  
420 cardiac CD206<sup>+</sup>IL-4R $\alpha$ <sup>+</sup> macrophage expansion in ischemic HF occurs most prominently  $\geq 4$  w  
421 post-MI, we induced myeloid IL-4R $\alpha$  deletion during late remodeling. Male and female IL-4R $\alpha$ <sup>ff</sup>  
422 and IL-4R $\alpha$ <sup>ff</sup>LysM-Cre<sup>ERT2</sup> HF mice with comparable LV remodeling at 4 w post-MI (or sham-  
423 operated controls) were randomized to receive tamoxifen diet for 6 weeks (*Figure 5A*). In male  
424 mice, echocardiography revealed significant LV dilation and systolic dysfunction in both HF  
425 groups 4 w post-MI as compared to sham (*Figure 5B*). In contrast, as compared with tamoxifen-  
426 fed IL-4R $\alpha$ <sup>ff</sup> HF mice, tamoxifen treatment for 6 w in IL-4R $\alpha$ <sup>ff</sup>LysM-Cre<sup>ERT2</sup> HF mice resulted in  
427 lower LVEDV and ESV, better LVEF and stroke volume (SV), and smaller heart size and  
428 normalized heart and lung weight (*Figures 5B, S8A-B*). Moreover, histological analysis revealed  
429 less border and remote zone fibrosis, smaller cardiomyocyte area, and improved capillary  
430 density in male IL-4R $\alpha$ <sup>ff</sup>LysM-Cre<sup>ERT2</sup> HF mice versus IL-4R $\alpha$ <sup>ff</sup> HF mice (*Figures 5C, S8C*).  
431 Myeloid IL-4R $\alpha$  deletion in HF in male mice also decreased levels of total leukocytes, CD206<sup>+</sup>  
432 and CD206<sup>-</sup> (and CD206<sup>-</sup>IL4R $\alpha$ <sup>+</sup>) macrophages, CD206<sup>+</sup>IL4R $\alpha$ <sup>+</sup> and CD206<sup>+</sup>IL10R $\alpha$ <sup>+</sup>  
433 macrophages, and proliferating Ki67<sup>+</sup>CD206<sup>+</sup> macrophages in the heart, as well as Ly6C<sup>hi</sup> and

434 Ly6C<sup>hi</sup>IL-4R $\alpha$ <sup>+</sup> monocytes (but not Ly6C<sup>low</sup> monocytes) in the blood, as compared to HF mice  
435 without myeloid IL-4R $\alpha$  deletion (*Figures 5D-F, S8D-F*). There were no effects of myeloid IL-  
436 4R $\alpha$  deletion on any parameter in sham male mice.

437         Comparable tamoxifen-induced effects were observed in female IL-4R $\alpha$ <sup>f/f</sup>LysM-Cre<sup>ERT2</sup>  
438 versus IL-4R $\alpha$ <sup>f/f</sup> HF mice with regard to improvements in LV remodeling and systolic function  
439 (albeit with less pronounced differences in LVEDV) (*Figure S9A-B*), heart and lung gravimetry  
440 and weight (*Figure S9C-D*), and reductions in cardiac leukocytes and total macrophages (Figure  
441 S10A), CD206<sup>+</sup> and CD206<sup>-</sup> macrophages, CD206<sup>+</sup>IL4R $\alpha$ <sup>+</sup> and CD206<sup>+</sup>IL10R $\alpha$ <sup>+</sup> macrophages,  
442 and CD206<sup>-</sup>IL4R $\alpha$ <sup>+</sup> macrophages (*Figures S10B-C*). As in males no effects of myeloid IL-4R $\alpha$   
443 deletion on any of these parameters were observed in sham-operated female mice. Collectively,  
444 these results indicate that CD206<sup>+</sup>IL4R $\alpha$ <sup>+</sup> macrophages are a key expanded myeloid cell  
445 population in the failing heart that is necessary for driving progressive inflammation and  
446 pathological cardiac remodeling, fibrosis, and dysfunction. Moreover, IL-4R $\alpha$  expression marks  
447 a macrophage subpopulation with high proliferative capacity in the failing heart.

448         **IL-4R $\alpha$  silencing *in vivo* reverses LV remodeling, reduces cardiac fibrosis, and**  
449 **improves neovascularization in HF.** To explore whether the macrophage IL-4R $\alpha$  axis could  
450 be exploited for therapeutic benefit in HF, we selectively silenced IL-4R $\alpha$  expression *in vivo*  
451 using optimized antisense oligonucleotides (ASOs) targeting IL-4R $\alpha$  mRNA.<sup>40,41</sup> IL-4R $\alpha$   
452 signaling mainly occurs in hematopoietic and lymphoid cells.<sup>45</sup> In humans, there is very low IL-  
453 4R RNA expression in heart cardiomyocytes and fibroblasts, with much more pronounced  
454 expression in immune cells, and in endothelial and smooth muscle cells  
455 (<https://www.proteinatlas.org/ENSG00000077238-IL4R/single+cell+type/heart+muscle>). To  
456 assure targeting of cardiac macrophages with this systemic approach, we performed flow  
457 cytometry to evaluate IL-4R $\alpha$  expression in cardiac leukocytes. As shown in *Figure S11*, in both  
458 sham and failing hearts, ~92% of all IL-4R $\alpha$ <sup>+</sup> CD45<sup>+</sup> leukocytes were macrophages

459 (F4/80<sup>+</sup>MERTK<sup>+</sup>), while ~98% of IL-4R $\alpha$ <sup>+</sup> macrophages in failing hearts were CD206<sup>+</sup>. Moreover,  
460 circulating monocytes and neutrophils exhibited low levels of IL-4R $\alpha$  expression (*Figure S2*).  
461 Hence, IL-4R $\alpha$  ASOs represent a feasible and directed approach for dual inhibition of IL-4 and  
462 IL-13 signaling<sup>45</sup> in cardiac CD206<sup>+</sup>IL-4R $\alpha$ <sup>+</sup> macrophages.

463 Male sham-operated and HF mice with comparable degrees of LV remodeling at 4 w post-  
464 MI were randomized to receive either IL-4R $\alpha$  ASOs or MM oligos (40 mg/kg every 3 days) for 4  
465 weeks (*Figure 6A*). Body weight was comparable between the two sham groups and two HF  
466 groups over the 4 w treatment period (*Figure S12A*). Serial echocardiography revealed  
467 significant and expected LV dilation and systolic dysfunction in both HF groups as compared to  
468 sham groups (*Figures 6B and S12B*). Sham-operated mice exhibited no changes in LVEDV,  
469 LVESV, stroke volume (SV), and LVEF during treatment with either IL-4R $\alpha$  ASOs or MM oligos.  
470 HF mice treated with MM oligos evidence progressive increases in LV chamber size, and  
471 reductions in LVEF and SV, over 4 w. In contrast, HF-IL-4R $\alpha$  ASO mice, which exhibited LV  
472 remodeling similar to HF-MM oligo mice at 4 w post-MI, exhibited significant reductions in EDV  
473 and ESV, and improvements in SV and EF, indicative of reverse remodeling. Lung and heart  
474 gravimetric analysis at 8 w post MI revealed substantially attenuated pulmonary edema and  
475 cardiac hypertrophy in HF-IL-4R $\alpha$  ASO HF mice versus HF-MM oligo mice, without impact on  
476 spleen weight (*Figures 6C and S12C*).

477 Histological evaluation with trichrome staining indicated significantly increased border and  
478 remote zone interstitial fibrosis in MM oligo-treated failing hearts as compared to MM oligo-  
479 treated sham hearts (*Figure 6D*). Impressively, IL-4R $\alpha$  ASO treatment profoundly decreased  
480 both border and remote zone fibrosis in failing hearts. Fibrotic area in IL-4R $\alpha$  ASO-treated sham  
481 hearts was comparable to that of MM oligo-treated sham hearts. Isolectin B4 and wheat-germ  
482 agglutinin staining (*Figure 6E*) indicated that both HF-MM oligo mice and HF-IL-4R $\alpha$  ASO mice  
483 exhibited significantly increased myocyte cross-sectional area and lower myocardial

484 capillary:myocyte ratio versus their respective sham groups. Importantly, however, myocyte  
485 area was lower and capillary:myocyte ratio was higher in HF-IL-4R $\alpha$  ASO mice versus HF-MM  
486 oligo mice, indicating alleviation of pathological hypertrophy and capillary rarefaction.

487 **IL-4R $\alpha$  silencing in HF depletes cardiac CD206<sup>+</sup>IL-4R $\alpha$ <sup>+</sup> macrophages and**  
488 **suppresses their proliferative and phagocytic capacity.** As shown in *Figures S13A and 6F*,  
489 4 w of IL-4R $\alpha$  ASO treatment significantly reduced the number of total CD45<sup>+</sup> leukocytes (by  
490 ~45%), total F4/80<sup>+</sup>MERTK<sup>+</sup> macrophages (by~53%), and both CD206<sup>+</sup> and CD206<sup>-</sup>  
491 macrophages (by ~50%) in the failing heart. Moreover, IL-4R $\alpha$  ASO treatment specifically and  
492 profoundly depleted CD206<sup>+</sup>IL-4R $\alpha$ <sup>+</sup> cardiac macrophages, while mildly augmenting CD206<sup>+</sup>IL-  
493 10R $\alpha$ <sup>+</sup> macrophages in the failing heart (*Figure 6F*). IL-4R $\alpha$  ASO administration did not impact  
494 leukocyte and total macrophage abundance in sham hearts. Notably, IL-4R $\alpha$  ASO therapy did  
495 not impact in circulating IL-4 levels (nor IL-13 and TGF- $\beta$ 1 levels) in HF mice, whereas serum  
496 IL-10 was significantly decreased (*Figures 6G and S13B*). Remarkably, total CD206<sup>-</sup>  
497 macrophages, including CD206<sup>-</sup>IL-4R $\alpha$ <sup>+</sup> and CD206<sup>-</sup>IL-10R $\alpha$ <sup>+</sup> macrophages, in failing hearts  
498 were also diminished by IL-4R $\alpha$  ASO treatment (*Figure S13A*). Additionally, IL-4R $\alpha$  ASO  
499 treatment impacted CD206<sup>+</sup> macrophage function in failing hearts, significantly reducing (by  
500 ~50%) both CD206<sup>+</sup> macrophage cell proliferation (Ki67 staining) and phagocytic capacity  
501 (assessed in vivo using fluorescent bioparticles) in HF-IL-4R $\alpha$  ASO mice as compared with HF-  
502 MM oligo mice (*Figures 6H-I*). The latter data are consistent with IL-4 serving as a potent  
503 stimulator of macrophage proliferation.<sup>15,55</sup>

504 IL-4R $\alpha$  ASO treatment in HF mice also abrogated systemic inflammation as evidenced  
505 by normalization of circulating Ly6C<sup>hi</sup> monocytes (and levels of Ly6C<sup>hi</sup>IL-4R $\alpha$ <sup>+</sup> monocytes) and  
506 serum levels of pro-inflammatory protein mediators TNF- $\alpha$ , MCP-1, MIP-2 $\alpha$  and IL-1 $\beta$  toward  
507 those observed in sham mice (*Figure S13C-D*). Serum IFN- $\gamma$  levels, however, were not  
508 impacted by IL-4R $\alpha$  ASO treatment and remained high in HF-IL-4R $\alpha$  ASO mice as compared to



509 sham. Importantly, IL-4R $\alpha$  ASO treatment in HF mice also alleviated T-cell expansion in both  
510 the circulation and failing heart, with significant reductions in peripheral blood and cardiac CD4<sup>+</sup>  
511 and CD8<sup>+</sup> T cells in HF-IL-4R $\alpha$  ASO mice as compared with HF-MM oligo mice (Figure S14).  
512 Additionally, IL-4R $\alpha$  expression was very low (~1-2%) in blood and heart CD4<sup>+</sup> and CD8<sup>+</sup> T cells  
513 in both sham and HF mice treated with MM oligo or IL-4R $\alpha$  ASOs. Taken together, these data  
514 indicate that in vivo IL-4R $\alpha$  mRNA silencing was highly effective in improving pathological  
515 cardiac remodeling, hypertrophy, fibrosis, and dysfunction, and in suppressing local and  
516 systemic inflammation in chronic ischemic HF.

517 **Fizz1 is essential for CD206<sup>+</sup> macrophage-induced myofibroblast activation.** FIZZ1,  
518 also known as resistin-like molecule  $\alpha$  (*Retnla*), is a 9.4 kDa cysteine-rich secreted protein  
519 produced mostly by macrophages during Th2 responses.<sup>50-52</sup> As described above, macrophage  
520 Fizz1 expression exponentially increased exclusively after M[IL-4] polarization (>7,500-fold after  
521 24 h and >100,000-fold after 48 h) polarization and not with M[IL-10] polarization (Figures 3B  
522 and S5B), and coincided with M[IL-4] macrophage-induced myofibroblast differentiation of  
523 cMSCs (Figure 3C). Accordingly, we further evaluated the role of Fizz1 in pro-fibrotic cellular  
524 responses. Exposure of cultured cMSCs to recombinant mouse (rm) Fizz1 induced, in a dose-  
525 dependent manner, the expression of proliferative genes *PCNA*, *Mki67*, *CyclinB1* and *CyclinD1*  
526 early (2 h), and profibrotic genes  *$\alpha$ -SMA*, *Col1 $\alpha$ 1*, *Col1 $\alpha$ 2*, and *Col3 $\alpha$ 1* late (16 h), after  
527 treatment (Figure S15), analogous to changes observed with M[IL-4] medium treatment (Figure  
528 3C). To determine the need for FIZZ1 in M[IL-4]-induced cMSC responses, we used anti-Fizz1  
529 antibody to neutralize endogenous Fizz1 in M[IL-4] conditioned medium. As shown in Figure  
530 S16, compared to IgG control, anti-Fizz1 significantly reduced the expression of mitotic genes,  
531  *$\alpha$ -SMA* (by 40%) and *Col3 $\alpha$ 1* in M[IL-4] conditioned media-treated cMSCs. Furthermore, anti-  
532 Fizz1 abrogated collagen gel contraction induced by M[IL-4] conditioned media (Figure 7A), a



533 phenomenon recapitulated by the use of Fizz1<sup>-/-</sup> BMDMs (Figure 7B), indicating that secreted  
534 Fizz1 is essential for M[IL-4]-induced cMSC myofibroblast differentiation and activation.

535 Notch signaling is critical for cell proliferation, differentiation, and development, and  
536 homeostasis;<sup>56</sup> Notch ligand binding to Notch receptors leads to release of Notch intracellular  
537 domain (NICD) and subsequent transcription of target genes, including  $\alpha$ -SMA, *Cyclin D1*,  
538 *Cyclin A* and NF- $\kappa$ B.<sup>56</sup> As  $\alpha$ -SMA expression is critical for myofibroblast fate of mesenchymal  
539 stromal cells,<sup>33,57</sup> we assessed the importance of Notch signaling in Fizz1-mediated  $\alpha$ -SMA  
540 expression in cMSCs. Fizz1 exposure significantly upregulated cMSC gene expression of the  
541 Notch1 ligands DLL-4 and Jagged1 within 30 minutes (Figure 7C), followed by increased protein  
542 expression of Notch1, NICD and  $\alpha$ -SMA within 24 h (Figure 7D). Importantly, Notch1 siRNA  
543 knockdown prevented  $\alpha$ -SMA (and NICD) upregulation in Fizz1-treated cMSCs, suggesting a  
544 critical role for DLL-4/Jagged-Notch1 signaling in the pro-fibrotic effects of M[IL-4] macrophage-  
545 secreted FIZZ1.

546 In view of the importance of FIZZ1 in M[IL-4]-induced myofibroblast differentiation, we  
547 next examined Fizz1 expression and spatial distribution using immunostaining in failing hearts  
548 from MM oligo- and IL-4R $\alpha$  ASO-treated mice (8 w post-MI). Consistent with flow data, a robust  
549 (~11-fold) expansion of CD206<sup>+</sup> macrophages (both IL-4R $\alpha$ <sup>+</sup> and IL-4R $\alpha$ <sup>-</sup>) was observed in MM  
550 oligo-treated failing hearts versus sham hearts, especially in the border zone (Figure 7E). IL-  
551 4R $\alpha$  staining was observed near exclusively in CD206<sup>+</sup> cells (Figure S17), further supporting  
552 CD206<sup>+</sup> macrophage-specificity of IL-4R $\alpha$  silencing, and Fizz1<sup>+</sup> staining was near exclusively  
553 spatially localized to IL-4R $\alpha$ <sup>+</sup> cells (~98% Fizz1<sup>+</sup>) in all groups (Figure S17). IL-4R $\alpha$ <sup>+</sup> Fizz1<sup>+</sup> cells  
554 comprised ~50% cardiac CD206<sup>+</sup> macrophages in HF-MM oligo mice (Figure 7E). IL-4R $\alpha$  ASO  
555 treatment significantly decreased IL-4R $\alpha$ <sup>+</sup>Fizz1<sup>+</sup> (and IL-4R $\alpha$ <sup>-</sup>Fizz1<sup>-</sup>) CD206<sup>+</sup> macrophages in  
556 failing hearts, and also diminished IL-4R $\alpha$  expression (assessed by fluorescence intensity)  
557 (Figure 7E). (Figures 7E and Figure S17). Hence, IL-4R $\alpha$  silencing in HF reduced CD206<sup>+</sup>

558 macrophage FIZZ1 expression in the failing heart concomitantly with improvements in cardiac  
559 fibrosis. Taken together with the *in vitro* studies above, our results suggest that *Fizz1* may be a  
560 key contributor to the tissue level pro-fibrotic effects of CD206<sup>+</sup>IL-4R $\alpha$ <sup>+</sup> macrophages in the  
561 failing heart.

562 **IL-4R $\alpha$ <sup>+</sup>Fizz3<sup>+</sup> alternatively activated macrophages expand and directly correlate**  
563 **with fibrosis in human failing hearts.** To understand translational relevance, we lastly  
564 explored whether alternatively activated resident macrophages are expanded in human HF. As  
565 mentioned above, resident cardiac macrophages express classical M2-like markers *Mrc1*  
566 (*CD206*) and *CD163*.<sup>2,6,13,14</sup> Cardiac mononuclear cells were isolated from the LV apex procured  
567 from advanced HF patients during LVAD implantation, and from control donor hearts unsuitable  
568 for transplantation. Analogous to murine HF, flow cytometry indicated significant expansion  
569 (~10-fold) of CD206<sup>+</sup> macrophages (CD45<sup>+</sup>Autofluorescence<sup>+</sup>CD64<sup>+</sup>) in human failing hearts  
570 versus control, with ~20% of CD206<sup>+</sup> macrophages expressing CCR2 (Figure 8A). Human  
571 failing hearts also exhibited substantial (>200-fold) interstitial fibrosis versus control hearts, with  
572 most (~95%) CD163<sup>+</sup> macrophages found in association with areas of collagen turnover (Figure  
573 8B), analogous to murine failing hearts. *Fizz3* (resistin, *Retn*), the human homolog of murine  
574 *Fizz1*, is expressed by M[IL-4/13] human macrophages and resembles mouse FIZZ1 with  
575 respect to sequence and function.<sup>58,59</sup> Accordingly, we performed immunostaining for IL-4R $\alpha$ ,  
576 *Fizz3* and *CD163*, a widely used marker for alternatively-activated human macrophages.<sup>60</sup> As  
577 shown in Figure 8C, human failing hearts exhibited significant expansion (~6-fold) of CD163<sup>+</sup>  
578 macrophages (both IL-4R $\alpha$ <sup>+</sup> and IL-4R $\alpha$ <sup>-</sup>) as compared to control hearts. *Fizz3*<sup>+</sup> staining was  
579 near exclusively spatially localized to IL-4R $\alpha$ <sup>+</sup> cells (~98% *Fizz3*<sup>+</sup>) in both human control and  
580 failing hearts, similar to the IL-4R $\alpha$  and *Fizz1* expression pattern observed in mouse hearts  
581 (Figure S17). Importantly, IL-4R $\alpha$ <sup>+</sup>*Fizz3*<sup>+</sup> cells comprised the predominant CD163<sup>+</sup> macrophage  
582 subset in human failing hearts, with approximately two-thirds of CD163<sup>+</sup> macrophages

583 expressing IL-4R $\alpha$  and Fizz3<sup>+</sup> (*Figure 8C*). CD163<sup>+</sup> macrophage abundance directly correlated  
584 with cardiac fibrosis in human HF. Hence, analogous to murine HF, human failing hearts also  
585 evidence expansion of alternatively activated macrophages, likely with augmented IL-4 signaling  
586 and contributing to pro-fibrotic responses.

## 587 **DISCUSSION**

588 We describe a novel role for cardiac CD206<sup>+</sup> macrophages alternatively activated by IL-  
589 4 receptor signaling in the progression of LV remodeling in ischemic cardiomyopathy. There are  
590 several key findings. First, macrophages expressing CD206 comprised most macrophages in  
591 the naïve heart. Following MI, cardiac CD206<sup>+</sup> macrophages progressively expanded, especially  
592 during the later stages of LV remodeling such that they comprised the predominant macrophage  
593 population in chronic HF. Second, CD206<sup>+</sup> macrophages were exclusively proliferative and  
594 primarily CCR2<sup>-</sup>, MHCII<sup>hi</sup>, and LYVE1<sup>+</sup> suggesting a resident cell population, and correlated with  
595 LV dysfunction and fibrosis. Second, a sizable subpopulation of these macrophages in HF  
596 expressed IL-4R $\alpha$ ; this occurred with attendant increased systemic levels of IL-4. Third, M[IL-4]  
597 (but not M[IL-10]) CD206<sup>+</sup> BMDMs induced remarkable upregulation of *Fizz1*, and robust cMSC  
598 myofibroblast differentiation. M[IL-4] CD206<sup>+</sup> macrophage-induced myofibroblast differentiation  
599 and activation were dependent on FIZZ1 secretion and mediated in part by FIZZ1 induction of  
600 DLL-4/Jagged1-Notch1 signaling in cMSCs. Fourth, intramyocardial adoptive transfer of M[IL-4]  
601 macrophages was sufficient to induce pathological cardiac remodeling and fibrosis. Fifth,  
602 myeloid-specific IL-4R $\alpha$  deletion tempered cardiac CD206<sup>+</sup> macrophage proliferation and  
603 alleviated LV dysfunction, fibrosis, and adverse remodeling. Sixth, IL-4R $\alpha$  silencing *in vivo* was  
604 highly effective in depleting CD206<sup>+</sup>IL-4R $\alpha$ <sup>+</sup> macrophages, reducing FIZZ1 expression in the  
605 failing heart, and reversing LV remodeling in mice with established HF. Lastly, humans exhibit  
606 expansion of alternatively activated macrophages in the failing heart marked by CD206 and  
607 CD163 expression, with predominance of a subpopulation expressing IL-4R $\alpha$  and Fizz3, the

608 human homolog of *Fizz1*. Collectively, these data establish that an expanded pool of  
609 alternatively activated CD206<sup>+</sup>IL-4R $\alpha$ <sup>+</sup> cardiac macrophages are key drivers of LV remodeling in  
610 HF, inducing a Th2/M2-like immuno-fibrotic response in part dependent on FIZZ1. Targeting IL-  
611 4 signaling in CD206<sup>+</sup> macrophages may represent a fruitful therapeutic approach to limit long-  
612 term cardiac remodeling in HF.

613 *Mrc1* (*Cd206*) and *Cd163* are typically expressed by resident cardiac macrophages  
614 under steady state conditions.<sup>2,6,13,14</sup> Moreover, in the naïve heart, CD206<sup>+</sup> macrophages  
615 express high levels of classical M2-like genes such as *Ym1* and *Fizz1* and are primarily CCR2<sup>-</sup>  
616 ,<sup>15</sup> suggesting a macrophage subset with minimal monocyte-dependence.<sup>6</sup> Prior work has  
617 shown that CD206<sup>+</sup> macrophages expand during the first week after acute MI in the infarct and  
618 border zone to promote infarct repair and functional restoration.<sup>15-17</sup> Administration of IL-4  
619 acutely (but not late) after MI also expands CD206<sup>+</sup> macrophages in the infarcted heart and  
620 recapitulates beneficial effects on post-MI cardiac healing.<sup>15,24</sup> However, the role of this  
621 macrophage population, and the impact of macrophage IL-4 signaling, in chronic LV remodeling  
622 and ischemic HF has not been defined. The chronically failing heart is typically marked by  
623 excessive tissue fibrosis.<sup>61</sup> Notably, in chronic pulmonary,<sup>62,63</sup> hepatic,<sup>41</sup> and renal<sup>25</sup> disease  
624 models marked by excessive fibrosis, alternatively activated (CD206<sup>+</sup> or CD163<sup>+</sup>) macrophage  
625 activation mediated by Th2 cytokines such as IL-4 contribute to disease progression. While we  
626 have previously shown that the post-MI failing heart exhibits increased IL-4 expression and a  
627 predominant Th2 CD4<sup>+</sup> T-cell profile,<sup>26</sup> whether a similar pathophysiological axis contributes to  
628 LV remodeling in ischemic cardiomyopathy is unknown.

629 Our studies show that CD206<sup>+</sup> macrophages progressively expand after MI, with  
630 particularly robust levels during the later stages of LV remodeling. Beyond the initial infiltration  
631 of predominantly (>80%) CD206<sup>-</sup> macrophages into the heart early (48 h) after MI, CD206<sup>+</sup>  
632 macrophages were the main subtype in the remodeling heart at 1 w post-MI and beyond,

633 comprising ~85% of all macrophages in HF. Moreover, in the failing heart 8 w post-MI, nearly  
634 half of all cardiac CD206<sup>+</sup> macrophages expressed IL-4R $\alpha$ . Notably, cardiac macrophage  
635 proliferation was observed exclusively in CD206<sup>+</sup> subpopulation in the failing heart. Although  
636 spatially expanded throughout the myocardium, CD206<sup>+</sup> macrophages were most abundant in  
637 the infarct scar and border zone, and primarily in regions of collagen turnover and fibrosis.  
638 Heightened macrophage proliferation was also mainly seen in the scar and border zones. This  
639 suggests that progressive CD206<sup>+</sup> macrophage expansion in these regions may contribute to  
640 extracellular matrix remodeling, infarct expansion and LV chamber dilatation over time. Human  
641 HF also evidenced marked expansion of alternatively activated (CD206<sup>+</sup> or CD163<sup>+</sup>) cardiac  
642 macrophages (consistent with a prior study of macrophages isolated from human failing hearts<sup>64</sup>)  
643 in association with regions of collagen denaturation and turnover, with a predominance of cells  
644 expressing IL-4R $\alpha$  analogous to murine HF. In this regard, IL-4 is a known stimulator of tissue  
645 macrophage proliferation and resident macrophage self-renewal<sup>55,65</sup> that also augments  
646 macrophage CD206 expression<sup>66</sup> and promotes M2-like cardiac macrophage differentiation.<sup>15</sup>  
647 Consistent with our prior studies,<sup>26</sup> IL-4 levels were increased both locally in the heart and  
648 systemically, suggesting that heightened IL-4 signaling may contribute importantly to sustaining  
649 local inflammation and macrophage expansion in failing myocardium.

650 In both murine and human HF, the expanded cardiac CD206<sup>+</sup> macrophage population  
651 was primarily CCR2<sup>-</sup> (~80%), MHCII<sup>hi</sup>, and LYVE1<sup>+</sup>. In naïve<sup>15</sup> and in sham-operated hearts,  
652 CD206<sup>+</sup> macrophages were also primarily CCR2<sup>-</sup>, albeit to much greater degrees (~95%) than  
653 in failing hearts. As LYVE1 is considered a marker of resident macrophages,<sup>6</sup> this suggests a  
654 predominantly resident macrophage population that is expanded in failing hearts, but also with a  
655 dual (albeit lesser) contribution from CCR2<sup>+</sup> monocyte-derived cells. Prior work has shown that  
656 after MI the absence of CCR2 expression does not exclude a monocyte origin as recruited  
657 macrophages over time may exhibit transcriptional identities nearly identical to resident

658 macrophages.<sup>6</sup> Our study design did not incorporate macrophage lineage tracing to definitively  
659 address this question. Nonetheless, our data are consistent with prior work indicating that  
660 cardiac macrophages derive from both local macrophage proliferation and recruited monocytes  
661 (locally-sourced cells comprising ~75%) in chronic ischemic HF.<sup>3,5</sup> Given our observations that  
662 the proportion of CCR2<sup>+</sup> cells increased significantly in failing hearts, and that cardiac  
663 macrophage abundance in post-MI HF was paralleled by similar dynamic changes in Ly6C<sup>high</sup>  
664 blood monocytes that source infiltrating macrophages,<sup>3,5,6,10</sup> we propose that the expanded and  
665 proliferative cardiac CD206<sup>+</sup> macrophage population derives from both resident and recruited  
666 cells.

667 We evaluated the pathophysiological importance of CD206<sup>+</sup>IL-4R $\alpha$ <sup>+</sup> expansion in the  
668 failing heart by experimentally manipulating IL-4R $\alpha$  signaling, which occurs largely in immune  
669 cells.<sup>45</sup> While both M[IL-4] and M[IL-10] macrophage polarization induced the upregulation of  
670 signature alternative macrophage activation genes, M[IL-4] polarization exclusively resulted in  
671 extraordinary upregulation of *Fizz1*, and functional myofibroblast differentiation of cMSCs,  
672 together with enhanced cMSC proliferative gene expression. Importantly, intramyocardial  
673 adoptive transfer of M[IL-4], but not M[IL-10], macrophages produced significant long-term LV  
674 chamber dilatation, dysfunction, and fibrosis in naïve recipients. Hence, IL-4-mediated activation  
675 of macrophages was sufficient to recapitulate chronic cardiac remodeling.

676 To establish the necessity of CD206<sup>+</sup>IL-4R $\alpha$ <sup>+</sup> macrophages in the pathogenesis of  
677 chronic LV remodeling, we evaluated the effects of myeloid IL-4R $\alpha$  deletion during established  
678 HF on subsequent LV remodeling. This manipulation primarily impacted macrophages in HF,  
679 given the very low levels of IL-4R $\alpha$  in neutrophils and monocytes. Notably, loss of macrophage  
680 IL-4 signaling via IL-4R $\alpha$  suppressed CD206<sup>+</sup> macrophage proliferation, abrogated the  
681 progression of LV remodeling, improved LV systolic function and fibrosis, while suppressing  
682 both CD206<sup>+</sup> and CD206<sup>-</sup> macrophages in the heart as well as systemic Ly6C<sup>hi</sup> monocytosis in

683 the blood. Beneficial effects of macrophage IL-4R $\alpha$  deletion were observed in both male and  
684 female mice. Hence, CD206<sup>+</sup>IL4R $\alpha$ <sup>+</sup> macrophages are indispensable for sustaining a chronic  
685 para-inflammatory response in failing myocardium that drives progressive cardiac remodeling in  
686 HF.

687 To explore a potential therapeutic avenue, we performed *in vivo* gene silencing of IL-  
688 4R $\alpha$  using ASOs, an approach that primarily targeted cardiac CD206<sup>+</sup> macrophages given the  
689 aforementioned low distribution of IL-4R $\alpha$  expression observed in other myeloid and lymphoid  
690 cell populations in chronic HF. IL-4R $\alpha$  silencing in chronic ischemic HF very effectively depleted  
691 cardiac CD206<sup>+</sup>IL-4R $\alpha$ <sup>+</sup> macrophages and suppressed their proliferation and phagocytic  
692 capacity, while inducing impressive reverse LV remodeling with improvements in cardiac fibrosis,  
693 neovascularization, and function, and suppression of both local and systemic inflammation (*e.g.*,  
694 blood and cardiac CD4<sup>+</sup> and CD8<sup>+</sup> T cell levels). Taken together, our results underscore the  
695 pathological effects of chronic macrophage IL-4R $\alpha$  activation in the failing heart and establish  
696 CD206<sup>+</sup>IL-4R $\alpha$ <sup>+</sup> macrophages as key mediators of pathological remodeling of the failing heart.  
697 Our data support biological or pharmacological blockade of the IL-4/IL-4R $\alpha$  pathway as a novel  
698 immunomodulatory paradigm in HF. For instance, antagonistic antibodies against IL-4R $\alpha$  are  
699 currently being developed for allergic disorders in humans,<sup>67</sup> and could potentially be  
700 repurposed for HF.

701 CD206<sup>+</sup> macrophage abundance in murine failing hearts (or CD163<sup>+</sup> macrophage  
702 abundance in human HF) correlated with the extent of cardiac fibrosis in chronic HF, and a  
703 prominent feature of IL-4-mediated CD206<sup>+</sup> macrophage activation *in vitro* and *in vivo* was the  
704 induction of pro-fibrotic responses. Our data suggest that the protein FIZZ1 secreted by M[IL-4]  
705 macrophages may play an important role in this crosstalk, given: 1) *in vitro* studies  
706 demonstrating incredibly robust macrophage *Fizz1* upregulation upon IL-4 stimulation, 2) FIZZ1  
707 dependence of the induction of cMSC myofibroblast differentiation by M[IL-4] macrophages,



708 potentially via DLL-4/Jagged1-Notch1 signaling, 3) exclusive expression of Fizz1 by cardiac  
709 CD206<sup>+</sup>IL-4R $\alpha$ <sup>+</sup> macrophages in chronic HF, and 4) exclusive expression of FIZZ3 (resistin),  
710 the human homolog of FIZZ1,<sup>58</sup> by CD163<sup>+</sup>IL-4R $\alpha$ <sup>+</sup> macrophages in human failing hearts. FIZZ1  
711 is secreted during Th2-type immune responses in mice.<sup>52,68</sup> and induces myofibroblast  
712 differentiation and fibrosis in the lung,<sup>53,54</sup> whereas FIZZ3 induces LV fibrosis and dysfunction  
713 when overexpressed in rat heart<sup>69</sup> and is a serum risk prediction biomarker in HF patients.<sup>70</sup> Our  
714 data are consistent with a key pro-fibrotic function for FIZZ1 in the failing heart, secreted by  
715 alternatively-activated CD206<sup>+</sup>IL-4R $\alpha$ <sup>+</sup> macrophages as part of an overall Th2/M2-like  
716 inflammatory milieu in the failing heart.<sup>26</sup> The elucidation of the precise role of Fizz1/Fizz3, and  
717 the potential for therapeutic Fizz1/Fizz3 blockade in HF, will require further study.

718 In summary, we have established a novel immunoinflammatory framework in the failing  
719 heart with an expanded pool of alternatively activated CD206<sup>+</sup>IL-4R $\alpha$ <sup>+</sup> macrophages as key  
720 drivers of LV remodeling. These alternatively-activated macrophages induce a para-  
721 inflammatory, immuno-fibrotic response, in part dependent on FIZZ1 expression, that promotes  
722 cardiac fibrosis and dysfunction. Our findings identify IL-4 signaling in CD206<sup>+</sup> macrophages,  
723 and potentially FIZZ1/FIZZ3 elaboration, as novel and appealing therapeutic targets for  
724 immunomodulation to limit long-term cardiac remodeling in ischemic cardiomyopathy and HF.

725

## 726 **ACKNOWLEDGEMENTS AND FUNDING**

727 This work was supported by National Institutes of Health R01 HL157999 and HL147549  
728 grants to SDP, and R01 HL137046 to TH.

729

## 730 **COMPETING INTERESTS**

731 There are no relevant author financial interests.

732



733 **FIGURE LEGENDS**

734 **Figure 1. Cardiac CD206<sup>+</sup> macrophages robustly expand and express IL-4R $\alpha$  in**  
735 **heart failure (HF). A**, Protocol for cardiac macrophage profiling by FACS in C57BL/6 mice at  
736 the indicated time points after non-reperfused myocardial infarction (MI) or sham operation. **B**  
737 and **C**, representative flow cytometry scatter plots (**B**) and group quantitation for cardiac  
738 macrophages (F4/80<sup>+</sup>MerTK<sup>+</sup>), and CD206<sup>+</sup> and CD206<sup>-</sup> subpopulations (**C**) from sham and MI  
739 mice at the indicated times post-operation. Quantitation from naïve mice also shown. **D**,  
740 Representative flow plots and group data for IL-4R $\alpha$  and IL-10R $\alpha$  expression in cardiac CD206<sup>+</sup>  
741 macrophages from the same mouse groups. Statistics: unpaired Student's t test; \*\* $p < 0.01$  vs  
742 respective sham group in **C-D**; \$\$ $p < 0.01$  vs Sham-CD206<sup>-</sup> in **C**, \$\$ $p < 0.01$  vs Sham-IL-10R $\alpha$ <sup>+</sup> in  
743 **D**. N=6-8 per group.

744 **Figure 2. Cardiac CD206<sup>+</sup> macrophages are proliferative, primarily MHCII<sup>hi</sup> and**  
745 **LYVE1<sup>+</sup>, and correlate with LV dysfunction and fibrosis in heart failure (HF). A**,  
746 Representative long-axis 2-dimensional echocardiograms at end-diastole and heart trichrome  
747 stains from HF mice 8 w after non-reperfused myocardial infarction (MI) and sham controls,  
748 along with correlations between cardiac CD206<sup>+</sup> macrophage number and LV ejection fraction  
749 (LVEF), and border and remote zone (BZ and RZ) fibrosis in failing hearts. **B**, Representative  
750 low and high magnification confocal images of failing heart (8 w post-MI) infarct, border, and  
751 remote zones (immuno)stained for CD206 (red) and collagen hybridizing peptide (CHP) (green),  
752 with quantitation of CHP-associated and -unassociated CD206<sup>+</sup> macrophages. DAPI (blue) was  
753 used to label nuclei. Scale bar 50  $\mu$ m. **C**, Flow plots and quantitation of CCR2 and LYVE1  
754 expression in CD206<sup>+</sup> macrophages and LYVE-1 expression in CD206<sup>+</sup>CCR2<sup>-</sup> macrophages in  
755 sham and HF hearts 8 w post-surgery, **D**, Low and high magnification confocal images of  
756 CD206 (red) and Ki67 (green) immunostains of sham, and the infarct, border and remote zones  
757 of failing hearts 8 w post-surgery, and quantitation of CD206<sup>+</sup> macrophages and Ki67

758 expression frequency. Nuclei labeled by DAPI (blue); yellow arrows indicate CD206<sup>+</sup>Ki67<sup>+</sup> cells.  
759 Scale bar 50  $\mu$ m. **E**, Flow plots and quantitation of Ki67 expression in both CD206<sup>+</sup> and CD206<sup>-</sup>  
760 cardiac macrophages from the same groups. Statistics: Pearson R correlation test in **Aa**;  
761 unpaired Student's t test in **C-E**. N=4-13 per group as indicated.

762 **Figure 3. IL-4-polarized bone marrow derived macrophages (BMDMs) induce**  
763 **cardiac mesenchymal stem cell (cMSC) myofibroblast differentiation *in vitro*.** **A**, Protocol  
764 for BMDM polarization and cMSC treatment with macrophage conditioned medium, and  
765 representative flow plots of F4/80 and CD206 expression in polarized BMDMs. **B**, Expression of  
766 the indicated genes in M0, M[IL-4], and M[IL-10] macrophages 24 h after polarization. **C**,  
767 Expression of the indicated genes in cMSCs treated with M0, M[IL-4], and M[IL-10] conditioned  
768 media for the indicated times, and representative cMSC-imbued collagen gel contraction assays  
769 upon exposure to M0, M[IL-4], and M[IL-10] conditioned media, or media alone (Ctrl), and  
770 quantitation of gel areas. Statistics: 1-way ANOVA with post-hoc Tukey's multiple comparison  
771 test; \*  $p < 0.05$ , \*\*  $p < 0.01$  vs. M0. N=5-6/group.

772 **Figure 4. Adoptive transfer of M[IL-4] macrophages to naïve hearts induces**  
773 **cardiac dysfunction and fibrosis.** **A**, Protocol for intramyocardial adoptive transfer of M0,  
774 M[IL-4], and M[IL-10] bone marrow derived macrophages (BMDMs) or PBS vehicle to naïve  
775 mice. **B**, M-mode echocardiograms of M0, M[IL-4], and M[IL-10] BMDM recipient mice 4 w post-  
776 transfer (PBS control), along with group data for LV end-systolic and end-diastolic volume (ESV  
777 and EDV), ejection fraction (EF) at indicated times post-transfer, and for echocardiographic LV  
778 mass normalized to tibia length (TL), and end-diastolic interventricular septal and posterior wall  
779 thickness (IVSWT and PWT) at 4 w post-transfer. **C**, Representative trichrome stains of  
780 recipient hearts at 4 w post-transfer and corresponding quantitation of cardiac fibrosis. **D**, *Top*,  
781 cardiac wheat-germ agglutinin (WGA, red) staining and quantitation of myocyte cross-sectional  
782 area; *Middle*, low and high magnification images of TUNEL (green) stained nuclei in  
783 cardiomyocytes ( $\alpha$ -Actinin, Red) and quantitation of apoptotic myocyte nuclei; and *Bottom*, Low

784 and high magnification confocal images of CD206 (red) and CD45.2 (gray) immunostains and  
785 quantitation of CD206<sup>+</sup>CD45.2<sup>+</sup> and CD206<sup>+</sup>CD45.2<sup>-</sup> macrophages in recipient hearts, all at 4 w  
786 post-transfer. Green arrows indicate apoptotic myocyte nuclei, red arrows indicate  
787 CD206<sup>+</sup>CD45.2<sup>-</sup> cells, and white arrows indicate CD206<sup>+</sup>CD45.2<sup>+</sup> cells. DAPI (blue) was used to  
788 label nuclei. **E**, Low and high magnification confocal images of CD206 (red) and CD45.2 (gray)  
789 immunostaining and CHP staining (green), and quantitation of CHP-associated and -  
790 unassociated, CD45.2<sup>+</sup> and CD45.2<sup>-</sup> CD206<sup>+</sup> macrophage ratios in M[IL-4] recipient hearts 4 w  
791 post-transfer. Nuclei were labeled by DAPI (blue). Red arrows indicate CHP-unassociated  
792 CD206<sup>+</sup>CD45.2<sup>-</sup> cells and white arrows indicate CHP-unassociated CD206<sup>+</sup>CD45.2<sup>+</sup> cells.  
793 Statistics: repeated-measures 1-way ANOVA with post-hoc Dunnett's multiple comparison test  
794 for time series within groups in **B**, 1-way ANOVA with post-hoc Tukey's multiple comparison test  
795 between groups in **B-D**, and unpaired Student's t test in **E**; \* $p < 0.05$ , \*\* $p < 0.01$  M[IL-4] vs. PBS;  
796 # $p < 0.05$ , ## $p < 0.01$  M[IL-4] vs. M0; \$ $p < 0.05$ , \$\$ $p < 0.01$  M[IL-4] vs. M[IL-10];  $\Delta p < 0.05$ ,  $\Delta\Delta p < 0.01$  vs.  
797 Bsln. N=6-8 per group as indicated.

798 **Figure 5. Myeloid-specific IL-4R $\alpha$  deletion suppresses cardiac CD206<sup>+</sup>**  
799 **macrophages and alleviates LV remodeling in heart failure (HF). A**, Protocol for myeloid-  
800 specific IL-4R $\alpha$  ablation in IL-4R $\alpha$ <sup>ff</sup>LysM-Cre<sup>ERT2</sup> sham and HF mice (IL-4R $\alpha$ <sup>ff</sup> mouse control)  
801 with tamoxifen administration in diet from 4 to 10 w post-MI or sham surgery. **B**, Representative  
802 long-axis 2D echocardiograms at end-diastole from male sham and HF mice after 6 w of  
803 tamoxifen (10 w post-surgery), along with directional changes in LV end-diastolic and end-  
804 systolic volume (EDV and ESV) and LV ejection fraction (EF) over this time. **C**, Representative  
805 trichrome stains of hearts from IL-4R $\alpha$ <sup>ff</sup> and IL-4R $\alpha$ <sup>ff</sup>LysM-Cre<sup>ERT2</sup> sham and HF mice after 6 w  
806 of tamoxifen (10 w post-surgery) along with fibrosis quantitation in the border and remote zone  
807 (BZ and RZ). **D** and **E**, Representative flow plots for cardiac macrophages (F4/80<sup>+</sup>MerTK<sup>+</sup>),  
808 CD206<sup>+</sup> macrophages, and IL-4R $\alpha$  and IL-10R $\alpha$  expressing CD206<sup>+</sup> subpopulations in IL-4R $\alpha$ <sup>ff</sup>

809 and IL-4R $\alpha^{ff}$ LysM-Cre<sup>ERT2</sup> HF mice, along with quantitative group data from both sham and HF  
810 male mice after 6 w of tamoxifen. **F**, Representative flow plots and quantitation of Ki67  
811 expression in cardiac CD206<sup>+</sup> and CD206<sup>-</sup> macrophages from IL-4R $\alpha^{ff}$  and IL-4R $\alpha^{ff}$ LysM-  
812 Cre<sup>ERT2</sup> HF mice given tamoxifen for 6 w. Statistics: 2-way ANOVA with post-hoc Tukey's  
813 multiple comparisons between groups in **B-E**; unpaired Student's t test in in **F**. N=7-11 per  
814 group.

815 **Figure 6. *In vivo* IL-4R $\alpha$  silencing depletes cardiac CD206<sup>+</sup> macrophages and**  
816 **reverses LV remodeling in heart failure (HF). **A****, Protocol for treatment with IL-4R $\alpha$  antisense  
817 oligonucleotides (ASOs) or mismatched (MM) control oligonucleotides (oligo) in HF mice from 4  
818 to 8 w after non-reperfused myocardial infarction (MI) (sham controls). **B**, Representative long-  
819 axis 2-dimensional echocardiograms at end-diastole from sham and HF mice treated with IL-  
820 4R $\alpha$  ASOs or MM Oligos for 4 w (8 w post-surgery timepoint). Also shown are group data for LV  
821 end-diastolic and end-systolic volume (EDV and ESV) and ejection fraction (EF) over the  
822 treatment period. **C**, Gross images of hearts from IL-4R $\alpha$  ASO- and MM Oligo-treated sham and  
823 HF mice, and group data for lung and heart weight (LW and HW) normalized to tibia length (TL).  
824 **D**, Representative trichrome stains of IL-4R $\alpha$  ASO- and MM Oligo-treated sham and failing  
825 hearts, and fibrosis quantitation in the border and remote zone (BZ and RZ). **E**, Representative  
826 cardiac isolectin B4 (IB4, green) and WGA (red) staining and quantitation of myocyte cross-  
827 sectional area and capillary:myocyte ratio in the LV RZ from IL-4R $\alpha$  ASO- and MM Oligo-treated  
828 sham and HF mice. **F**, *Left*, quantitation of cardiac CD206<sup>+</sup> macrophages, and *Middle and Right*,  
829 flow plots and quantitation of IL-4R $\alpha$  and IL-10R $\alpha$  expressing subpopulations, in sham and HF  
830 mice treated with IL-4R $\alpha$  ASOs or MM Oligos for 4 w. **G**, Serum levels of IL-4 and IL-10 from the  
831 same groups. **H** and **I**, Representative flow cytometry histograms, dot plots, and quantitation of  
832 cardiac Ki67<sup>+</sup> (**H**) or bioparticle<sup>+</sup> (**I**) CD206<sup>+</sup> and CD206<sup>-</sup> macrophages in IL-4R $\alpha$  ASO- and MM  
833 Oligo- treated HF mice. Statistics: repeated-measures 1-way ANOVA with post-hoc Dunnett's

834 multiple comparison test for time series within groups in **B**; 2-way ANOVA with post-hoc Tukey's  
835 multiple comparisons between groups in **B-F, H, I**; unpaired Student's t test in **G**. \*\* $p < 0.01$  vs.  
836 respective Sham-MM Oligo; ## $p < 0.01$  vs. HF-MM Oligo at the same week post-surgery;  $\Delta p < 0.05$ ,  
837  $\Delta\Delta p < 0.01$  vs. respective 4 w timepoint. N=5-8 per group.

838 **Figure 7. Fizz1 is essential for CD206<sup>+</sup> macrophage-induced myofibroblast**  
839 **differentiation of cardiac mesenchymal stem cells (cMSCs).** **A**, cMSC-imbued collagen gel  
840 contraction assays upon exposure to M[IL-4] bone marrow-derived macrophage (BMDM)  
841 conditioned media or media alone control (Ctrl) containing isotype IgG or anti-Fizz1 antibody  
842 with corresponding quantitation of gel areas. **B**, cMSC gel contraction assays upon exposure to  
843 wild-type (WT) and Fizz1<sup>-/-</sup> M0 or M[IL-4] BMDM conditioned media, and quantitation of gel  
844 areas. N=3-5 per group for **A-B**. **C**, cMSC DLL-4 and Jagged1 gene expression after 30  
845 minutes of treatment with either vehicle (Ctrl) or recombinant mouse (rm) Fizz1 50 ng/ml and  
846 100 ng/ml. **D**, Immunoblotting and group quantitation for Notch1, Notch intracellular domain  
847 (NICD), and  $\alpha$ -smooth muscle actin ( $\alpha$ -SMA) protein expression in cMSCs treated with either  
848 vehicle Ctrl or rmFizz1 for 24 h following scrambled or Notch1 siRNA transfection. GAPDH  
849 loading control. **E**, Representative low and high magnification confocal images of immunostains  
850 for CD206 (red), IL-4R $\alpha$  (white) and Fizz1 (green) of hearts from sham and HF hearts (border  
851 zone) from MM Oligo- or IL-4R $\alpha$  ASO-treated mice, with quantitation of CD206<sup>+</sup>IL-4R $\alpha$ <sup>+</sup>Fizz1<sup>+</sup>  
852 and CD206<sup>+</sup>IL-4R $\alpha$ <sup>-</sup>Fizz1<sup>-</sup> macrophages, and IL-4R $\alpha$  fluorescent intensity (arbitrary units [a.u.])  
853 n=5-8/group. DAPI (blue) was used to label nuclei. Red arrows indicate CD206<sup>+</sup>IL-4R $\alpha$ <sup>-</sup>Fizz1<sup>-</sup>  
854 cells and yellow arrows indicate CD206<sup>+</sup>IL-4R $\alpha$ <sup>+</sup>Fizz1<sup>+</sup> cells. Statistics: 2-way ANOVA followed  
855 by Tukey's multiple comparison test, except 1-way ANOVA followed by Tukey's multiple  
856 comparison test in panel **C**; \* $p < 0.05$ , \*\* $p < 0.01$  vs. Ctrl in **C**; \*\* $p < 0.01$  vs. Ctrl-scramble siRNA,  
857 ## $p < 0.01$  vs. rmFIZZ1-scramble siRNA in **D**. N=6 per group. MM, mismatched; ASO, antisense  
858 oligonucleotide.

859 **Figure 8. Alternatively activated cardiac macrophages expand, express IL-4R $\alpha$  and**  
860 **FIZZ3, and directly correlate with fibrosis in human heart failure (HF).** **A**, Representative  
861 flow plots for CD45<sup>+</sup>Autofluorescence(Auto)<sup>+</sup>CD64<sup>+</sup>CD206<sup>+</sup> macrophages and their CCR2  
862 expression, and group quantitation for CD206<sup>+</sup> macrophages in normal control (Ctrl; n=3) and  
863 failing (n=13) human hearts (from LV assist device core tissue). **B**, Representative trichrome  
864 stains (*Top*) and low and high magnification (immuno)stains for CD163 (red) and collagen-  
865 hybridizing peptide (CHP, green) (*Bottom*) of Ctrl and failing human hearts, with corresponding  
866 quantitation of cardiac fibrosis (10 Ctrl, 19 failing hearts) and CHP-associated and -  
867 unassociated CD163<sup>+</sup> macrophage frequency (n=7/group). **C**, Low and high magnification  
868 confocal images of immunostains for CD163 (white), IL-4R $\alpha$  (red) and Fizz3 (green) in normal  
869 (Ctrl; n=4) and failing (n=8) human hearts (HF), and quantitation of IL-4R $\alpha$ <sup>+</sup>Fizz3<sup>+</sup> and IL-  
870 4R $\alpha$ <sup>-</sup>Fizz3<sup>-</sup> CD163<sup>+</sup> macrophages. DAPI (blue) was used to label nuclei. White arrows indicate  
871 CD163<sup>+</sup>IL-4R $\alpha$ <sup>-</sup>Fizz3<sup>-</sup> cells, and yellow arrows indicate CD163<sup>+</sup>IL-4R $\alpha$ <sup>+</sup>Fizz3<sup>+</sup> cells. Also shown  
872 is the correlation between CD163<sup>+</sup> macrophage abundance and LV fibrosis in human HF, n=19.  
873 Statistics: Mann-Whitney test in **A**; unpaired Student's t test in **B-C**; Pearson R correlation test  
874 in **C, lower right panel**.



875 **REFERENCES**

- 876 1. Adamo L, Rocha-Resende C, Prabhu SD, Mann DL. Reappraising the role of  
877 inflammation in heart failure. *Nat Rev Cardiol.* 2020;17:269-285. doi: 10.1038/s41569-  
878 019-0315-x
- 879 2. Bajpai G, Schneider C, Wong N, Bredemeyer A, Hulsmans M, Nahrendorf M, Epelman S,  
880 Kreisel D, Liu Y, Itoh A, et al. The human heart contains distinct macrophage subsets  
881 with divergent origins and functions. *Nat Med.* 2018;24:1234-1245. doi: 10.1038/s41591-  
882 018-0059-x
- 883 3. Heidt T, Courties G, Dutta P, Sager HB, Sebas M, Iwamoto Y, Sun Y, Da Silva N,  
884 Panizzi P, van der Laan AM, et al. Differential contribution of monocytes to heart  
885 macrophages in steady-state and after myocardial infarction. *Circ Res.* 2014;115:284-  
886 295. doi: 10.1161/CIRCRESAHA.115.303567
- 887 4. Ismahil MA, Hamid T, Bansal SS, Patel B, Kingery JR, Prabhu SD. Remodeling of the  
888 mononuclear phagocyte network underlies chronic inflammation and disease  
889 progression in heart failure: critical importance of the cardiosplenic axis. *Circ Res.*  
890 2014;114:266-282. doi: 10.1161/CIRCRESAHA.113.301720
- 891 5. Sager HB, Hulsmans M, Lavine KJ, Moreira MB, Heidt T, Courties G, Sun Y, Iwamoto Y,  
892 Tricot B, Khan OF, et al. Proliferation and Recruitment Contribute to Myocardial  
893 Macrophage Expansion in Chronic Heart Failure. *Circ Res.* 2016;119:853-864. doi:  
894 10.1161/CIRCRESAHA.116.309001
- 895 6. Dick SA, Macklin JA, Nejat S, Momen A, Clemente-Casares X, Althagafi MG, Chen J,  
896 Kantores C, Hosseinzadeh S, Aronoff L, et al. Self-renewing resident cardiac  
897 macrophages limit adverse remodeling following myocardial infarction. *Nat Immunol.*  
898 2019;20:29-39. doi: 10.1038/s41590-018-0272-2
- 899 7. Epelman S, Lavine KJ, Beaudin AE, Sojka DK, Carrero JA, Calderon B, Brija T, Gautier  
900 EL, Ivanov S, Satpathy AT, et al. Embryonic and adult-derived resident cardiac  
901 macrophages are maintained through distinct mechanisms at steady state and during  
902 inflammation. *Immunity.* 2014;40:91-104. doi: 10.1016/j.immuni.2013.11.019
- 903 8. Lavine KJ, Epelman S, Uchida K, Weber KJ, Nichols CG, Schilling JD, Ornitz DM,  
904 Randolph GJ, Mann DL. Distinct macrophage lineages contribute to disparate patterns  
905 of cardiac recovery and remodeling in the neonatal and adult heart. *Proc Natl Acad Sci*  
906 *U S A.* 2014;111:16029-16034. doi: 10.1073/pnas.1406508111
- 907 9. Bajpai G, Bredemeyer A, Li W, Zaitsev K, Koenig AL, Lokshina I, Mohan J, Ivey B, Hsiao  
908 HM, Weinheimer C, et al. Tissue Resident CCR2- and CCR2+ Cardiac Macrophages  
909 Differentially Orchestrate Monocyte Recruitment and Fate Specification Following  
910 Myocardial Injury. *Circ Res.* 2019;124:263-278. doi: 10.1161/CIRCRESAHA.118.314028
- 911 10. Hilgendorf I, Gerhardt LM, Tan TC, Winter C, Holderried TA, Chousterman BG, Iwamoto  
912 Y, Liao R, Zirlik A, Scherer-Crosbie M, et al. Ly-6Chigh monocytes depend on Nr4a1 to  
913 balance both inflammatory and reparative phases in the infarcted myocardium. *Circ Res.*  
914 2014;114:1611-1622. doi: 10.1161/CIRCRESAHA.114.303204
- 915 11. Prabhu SD, Frangogiannis NG. The Biological Basis for Cardiac Repair After Myocardial  
916 Infarction: From Inflammation to Fibrosis. *Circ Res.* 2016;119:91-112. doi:  
917 10.1161/CIRCRESAHA.116.303577
- 918 12. Prabhu SD. The Cardiosplenic Axis Is Essential for the Pathogenesis of Ischemic Heart  
919 Failure. *Trans Am Clin Climatol Assoc.* 2018;129:202-214.
- 920 13. Revelo XS, Parthiban P, Chen C, Barrow F, Fredrickson G, Wang H, Yucel D, Herman A,  
921 van Berlo JH. Cardiac Resident Macrophages Prevent Fibrosis and Stimulate  
922 Angiogenesis. *Circ Res.* 2021;129:1086-1101. doi: 10.1161/CIRCRESAHA.121.319737
- 923 14. Martini E, Kunderfranco P, Peano C, Carullo P, Cremonesi M, Schorn T, Carriero R,  
924 Termanini A, Colombo FS, Jachetti E, et al. Single-Cell Sequencing of Mouse Heart

- 925 Immune Infiltrate in Pressure Overload-Driven Heart Failure Reveals Extent of Immune  
926 Activation. *Circulation*. 2019;140:2089-2107. doi:  
927 10.1161/CIRCULATIONAHA.119.041694
- 928 15. Shiraishi M, Shintani Y, Shintani Y, Ishida H, Saba R, Yamaguchi A, Adachi H, Yashiro  
929 K, Suzuki K. Alternatively activated macrophages determine repair of the infarcted adult  
930 murine heart. *J Clin Invest*. 2016;126:2151-2166. doi: 10.1172/JCI85782
- 931 16. Yan X, Anzai A, Katsumata Y, Matsuhashi T, Ito K, Endo J, Yamamoto T, Takeshima A,  
932 Shinmura K, Shen W, et al. Temporal dynamics of cardiac immune cell accumulation  
933 following acute myocardial infarction. *J Mol Cell Cardiol*. 2013;62:24-35. doi:  
934 10.1016/j.yjmcc.2013.04.023
- 935 17. Leblond AL, Klinkert K, Martin K, Turner EC, Kumar AH, Browne T, Caplice NM.  
936 Systemic and Cardiac Depletion of M2 Macrophage through CSF-1R Signaling Inhibition  
937 Alters Cardiac Function Post Myocardial Infarction. *PLoS One*. 2015;10:e0137515. doi:  
938 10.1371/journal.pone.0137515
- 939 18. Gordon S, Martinez FO. Alternative activation of macrophages: mechanism and  
940 functions. *Immunity*. 2010;32:593-604. doi: 10.1016/j.immuni.2010.05.007
- 941 19. Martinez FO, Gordon S. The M1 and M2 paradigm of macrophage activation: time for  
942 reassessment. *F1000Prime Rep*. 2014;6:13. doi: 10.12703/P6-13
- 943 20. Murray PJ, Allen JE, Biswas SK, Fisher EA, Gilroy DW, Goerdt S, Gordon S, Hamilton  
944 JA, Ivashkiv LB, Lawrence T, et al. Macrophage activation and polarization:  
945 nomenclature and experimental guidelines. *Immunity*. 2014;41:14-20. doi:  
946 10.1016/j.immuni.2014.06.008
- 947 21. Wynn TA, Vannella KM. Macrophages in Tissue Repair, Regeneration, and Fibrosis.  
948 *Immunity*. 2016;44:450-462. doi: 10.1016/j.immuni.2016.02.015
- 949 22. Tugal D, Liao X, Jain MK. Transcriptional control of macrophage polarization.  
950 *Arterioscler Thromb Vasc Biol*. 2013;33:1135-1144. doi: 10.1161/ATVBAHA.113.301453
- 951 23. Mantovani A, Sica A, Sozzani S, Allavena P, Vecchi A, Locati M. The chemokine system  
952 in diverse forms of macrophage activation and polarization. *Trends Immunol*.  
953 2004;25:677-686. doi: 10.1016/j.it.2004.09.015
- 954 24. Shintani Y, Ito T, Fields L, Shiraishi M, Ichihara Y, Sato N, Podaru M, Kainuma S,  
955 Tanaka H, Suzuki K. IL-4 as a Repurposed Biological Drug for Myocardial Infarction  
956 through Augmentation of Reparative Cardiac Macrophages: Proof-of-Concept Data in  
957 Mice. *Sci Rep*. 2017;7:6877. doi: 10.1038/s41598-017-07328-z
- 958 25. Tang PM, Nikolic-Paterson DJ, Lan HY. Macrophages: versatile players in renal  
959 inflammation and fibrosis. *Nat Rev Nephrol*. 2019;15:144-158. doi: 10.1038/s41581-019-  
960 0110-2
- 961 26. Bansal SS, Ismahil MA, Goel M, Patel B, Hamid T, Rokosh G, Prabhu SD. Activated T  
962 Lymphocytes are Essential Drivers of Pathological Remodeling in Ischemic Heart Failure.  
963 *Circ Heart Fail*. 2017;10:e003688. doi: 10.1161/CIRCHEARTFAILURE.116.003688
- 964 27. Herbert DR, Holscher C, Mohrs M, Arendse B, Schwegmann A, Radwanska M, Leeto M,  
965 Kirsch R, Hall P, Mossmann H, et al. Alternative macrophage activation is essential for  
966 survival during schistosomiasis and downmodulates T helper 1 responses and  
967 immunopathology. *Immunity*. 2004;20:623-635. doi: 10.1016/s1074-7613(04)00107-4
- 968 28. Vishlaghi N, Guo L, Griswold-Wheeler D, Sun Y, Booker C, Crossley JL, Bancroft AC,  
969 Juan C, Korlakunta S, Ramesh S, et al. Vegfc-expressing cells form heterotopic bone  
970 after musculoskeletal injury. *Cell Rep*. 2024;43:114049. doi:  
971 10.1016/j.celrep.2024.114049
- 972 29. Bansal SS, Ismahil MA, Goel M, Zhou G, Rokosh G, Hamid T, Prabhu SD. Dysfunctional  
973 and Proinflammatory Regulatory T-Lymphocytes Are Essential for Adverse Cardiac  
974 Remodeling in Ischemic Cardiomyopathy. *Circulation*. 2019;139:206-221. doi:  
975 10.1161/CIRCULATIONAHA.118.036065



- 976 30. Hamid T, Gu Y, Ortines RV, Bhattacharya C, Wang G, Xuan YT, Prabhu SD. Divergent  
977 tumor necrosis factor receptor-related remodeling responses in heart failure: role of  
978 nuclear factor-kappaB and inflammatory activation. *Circulation*. 2009;119:1386-1397. doi:  
979 10.1161/CIRCULATIONAHA.108.802918
- 980 31. Wang G, Hamid T, Keith RJ, Zhou G, Partridge CR, Xiang X, Kingery JR, Lewis RK, Li Q,  
981 Rokosh DG, et al. Cardioprotective and antiapoptotic effects of heme oxygenase-1 in the  
982 failing heart. *Circulation*. 2010;121:1912-1925. doi:  
983 10.1161/CIRCULATIONAHA.109.905471
- 984 32. Patel B, Bansal SS, Ismahil MA, Hamid T, Rokosh G, Mack M, Prabhu SD. CCR2(+)  
985 Monocyte-Derived Infiltrating Macrophages Are Required for Adverse Cardiac  
986 Remodeling During Pressure Overload. *JACC Basic Transl Sci*. 2018;3:230-244. doi:  
987 10.1016/j.jacbts.2017.12.006
- 988 33. Hamid T, Xu Y, Ismahil MA, Rokosh G, Jinno M, Zhou G, Wang Q, Prabhu SD. Cardiac  
989 Mesenchymal Stem Cells Promote Fibrosis and Remodeling in Heart Failure: Role of  
990 PDGF Signaling. *JACC Basic Transl Sci*. 2022;7:465-483. doi:  
991 10.1016/j.jacbts.2022.01.004
- 992 34. Wang Q, Wang S, Sun Z. Kidney-Specific Klotho Gene Deletion Causes Aortic  
993 Aneurysm via Hyperphosphatemia. *Hypertension*. 2021;78:308-319. doi:  
994 10.1161/HYPERTENSIONAHA.121.17299
- 995 35. Tang L, Zhang H, Wang C, Li H, Zhang Q, Bai J. M2A and M2C Macrophage Subsets  
996 Ameliorate Inflammation and Fibroproliferation in Acute Lung Injury Through Interleukin  
997 10 Pathway. *Shock*. 2017;48:119-129. doi: 10.1097/SHK.0000000000000820
- 998 36. Hamid T, Xu Y, Ismahil MA, Li Q, Jones SP, Bhatnagar A, Bolli R, Prabhu SD. TNF  
999 receptor signaling inhibits cardiomyogenic differentiation of cardiac stem cells and  
1000 promotes a neuroadrenergic-like fate. *Am J Physiol Heart Circ Physiol*. 2016;311:H1189-  
1001 H1201. doi: 10.1152/ajpheart.00904.2015
- 1002 37. Bujak M, Ratkaj I, Markova-Car E, Jurisic D, Horvatic A, Vucinic S, Lerga J, Baus-Loncar  
1003 M, Pavelic K, Kraljevic Pavelic S. Inflammatory Gene Expression Upon TGF-beta1-  
1004 Induced p38 Activation in Primary Dupuytren's Disease Fibroblasts. *Front Mol Biosci*.  
1005 2015;2:68. doi: 10.3389/fmolb.2015.00068
- 1006 38. Covarrubias R, Ismahil MA, Rokosh G, Hamid T, Accornero F, Singh H, Gumina RJ,  
1007 Prabhu SD, Bansal SS. Optimized protocols for isolation, fixation, and flow cytometric  
1008 characterization of leukocytes in ischemic hearts. *Am J Physiol Heart Circ Physiol*.  
1009 2019;317:H658-H666. doi: 10.1152/ajpheart.00137.2019
- 1010 39. Trouplin V, Boucherit N, Gorvel L, Conti F, Mottola G, Ghigo E. Bone marrow-derived  
1011 macrophage production. *J Vis Exp*. 2013:e50966. doi: 10.3791/50966
- 1012 40. Ripple MJ, You D, Honnegowda S, Giaimo JD, Sewell AB, Becnel DM, Cormier SA.  
1013 Immunomodulation with IL-4R alpha antisense oligonucleotide prevents respiratory  
1014 syncytial virus-mediated pulmonary disease. *J Immunol*. 2010;185:4804-4811. doi:  
1015 10.4049/jimmunol.1000484
- 1016 41. Weng SY, Wang X, Vijayan S, Tang Y, Kim YO, Padberg K, Regen T, Molokanova O,  
1017 Chen T, Bopp T, et al. IL-4 Receptor Alpha Signaling through Macrophages Differentially  
1018 Regulates Liver Fibrosis Progression and Reversal. *EBioMedicine*. 2018;29:92-103. doi:  
1019 10.1016/j.ebiom.2018.01.028
- 1020 42. Nahrendorf M, Swirski FK, Aikawa E, Stangenberg L, Wurdinger T, Figueiredo JL, Libby  
1021 P, Weissleder R, Pittet MJ. The healing myocardium sequentially mobilizes two  
1022 monocyte subsets with divergent and complementary functions. *J Exp Med*.  
1023 2007;204:3037-3047. doi: 10.1084/jem.20070885
- 1024 43. Bakhshian Nik A, Alvarez-Argote S, O'Meara CC. Interleukin 4/13 signaling in cardiac  
1025 regeneration and repair. *Am J Physiol Heart Circ Physiol*. 2022;323:H833-H844. doi:  
1026 10.1152/ajpheart.00310.2022

- 1027 44. Shankar A, McAlees JW, Lewkowich IP. Modulation of IL-4/IL-13 cytokine signaling in  
1028 the context of allergic disease. *J Allergy Clin Immunol.* 2022;150:266-276. doi:  
1029 10.1016/j.jaci.2022.06.012
- 1030 45. Junntila IS. Tuning the Cytokine Responses: An Update on Interleukin (IL)-4 and IL-13  
1031 Receptor Complexes. *Front Immunol.* 2018;9:888. doi: 10.3389/fimmu.2018.00888
- 1032 46. Krawiec P, Pawlowska-Kamieniak A, Pac-Kozuchowska E. Interleukin 10 and interleukin  
1033 10 receptor in paediatric inflammatory bowel disease: from bench to bedside lesson. *J*  
1034 *Inflamm (Lond).* 2021;18:13. doi: 10.1186/s12950-021-00279-3
- 1035 47. Walter MR. The molecular basis of IL-10 function: from receptor structure to the onset of  
1036 signaling. *Curr Top Microbiol Immunol.* 2014;380:191-212. doi: 10.1007/978-3-662-  
1037 43492-5\_9
- 1038 48. Jones B, Debski A, Hans CP, Go MR, Agarwal G. Structurally abnormal collagen fibrils  
1039 in abdominal aortic aneurysm resist platelet adhesion. *J Thromb Haemost.* 2022;20:470-  
1040 477. doi: 10.1111/jth.15576
- 1041 49. Cao Q, Wang Y, Zheng D, Sun Y, Wang Y, Lee VW, Zheng G, Tan TK, Ince J,  
1042 Alexander SI, et al. IL-10/TGF-beta-modified macrophages induce regulatory T cells and  
1043 protect against adriamycin nephrosis. *J Am Soc Nephrol.* 2010;21:933-942. doi:  
1044 10.1681/ASN.2009060592
- 1045 50. Roszer T. Understanding the Mysterious M2 Macrophage through Activation Markers  
1046 and Effector Mechanisms. *Mediators Inflamm.* 2015;2015:816460. doi:  
1047 10.1155/2015/816460
- 1048 51. Nair MG, Du Y, Perrigoue JG, Zaph C, Taylor JJ, Goldschmidt M, Swain GP,  
1049 Yancopoulos GD, Valenzuela DM, Murphy A, et al. Alternatively activated macrophage-  
1050 derived RELM- $\alpha$  is a negative regulator of type 2 inflammation in the lung. *J Exp*  
1051 *Med.* 2009;206:937-952. doi: 10.1084/jem.20082048
- 1052 52. Nair MG, Gallagher IJ, Taylor MD, Loke P, Coulson PS, Wilson RA, Maizels RM, Allen  
1053 JE. Chitinase and Fizz family members are a generalized feature of nematode infection  
1054 with selective upregulation of Ym1 and Fizz1 by antigen-presenting cells. *Infect Immun.*  
1055 2005;73:385-394. doi: 10.1128/IAI.73.1.385-394.2005
- 1056 53. Liu T, Hu B, Choi YY, Chung M, Ullenbruch M, Yu H, Lowe JB, Phan SH. Notch1  
1057 signaling in FIZZ1 induction of myofibroblast differentiation. *Am J Pathol.*  
1058 2009;174:1745-1755. doi: 10.2353/ajpath.2009.080618
- 1059 54. Liu T, Yu H, Ullenbruch M, Jin H, Ito T, Wu Z, Liu J, Phan SH. The in vivo fibrotic role of  
1060 FIZZ1 in pulmonary fibrosis. *PLoS One.* 2014;9:e88362. doi:  
1061 10.1371/journal.pone.0088362
- 1062 55. Jenkins SJ, Ruckerl D, Thomas GD, Hewitson JP, Duncan S, Brombacher F, Maizels  
1063 RM, Hume DA, Allen JE. IL-4 directly signals tissue-resident macrophages to proliferate  
1064 beyond homeostatic levels controlled by CSF-1. *J Exp Med.* 2013;210:2477-2491. doi:  
1065 10.1084/jem.20121999
- 1066 56. Rizzo P, Miele L, Ferrari R. The Notch pathway: a crossroad between the life and death  
1067 of the endothelium. *Eur Heart J.* 2013;34:2504-2509. doi: 10.1093/eurheartj/ehs141
- 1068 57. Talele NP, Fradette J, Davies JE, Kapus A, Hinz B. Expression of alpha-Smooth Muscle  
1069 Actin Determines the Fate of Mesenchymal Stromal Cells. *Stem Cell Reports.*  
1070 2015;4:1016-1030. doi: 10.1016/j.stemcr.2015.05.004
- 1071 58. Lurier EB, Dalton D, Dampier W, Raman P, Nassiri S, Ferraro NM, Rajagopalan R,  
1072 Sarmady M, Spiller KL. Transcriptome analysis of IL-10-stimulated (M2c) macrophages  
1073 by next-generation sequencing. *Immunobiology.* 2017;222:847-856. doi:  
1074 10.1016/j.imbio.2017.02.006
- 1075 59. Pine GM, Batugedara HM, Nair MG. Here, there and everywhere: Resistin-like  
1076 molecules in infection, inflammation, and metabolic disorders. *Cytokine.* 2018;110:442-  
1077 451. doi: 10.1016/j.cyto.2018.05.014

- 1078 60. Etzerodt A, Moestrup SK. CD163 and inflammation: biological, diagnostic, and  
1079 therapeutic aspects. *Antioxid Redox Signal*. 2013;18:2352-2363. doi:  
1080 10.1089/ars.2012.4834
- 1081 61. Frangogiannis NG. Cardiac fibrosis. *Cardiovasc Res*. 2021;117:1450-1488. doi:  
1082 10.1093/cvr/cvaa324
- 1083 62. Pechkovsky DV, Prasse A, Kollert F, Engel KM, Dentler J, Luttmann W, Friedrich K,  
1084 Muller-Quernheim J, Zissel G. Alternatively activated alveolar macrophages in  
1085 pulmonary fibrosis-mediator production and intracellular signal transduction. *Clin*  
1086 *Immunol*. 2010;137:89-101. doi: 10.1016/j.clim.2010.06.017
- 1087 63. Wang J, Xu L, Xiang Z, Ren Y, Zheng X, Zhao Q, Zhou Q, Zhou Y, Xu L, Wang Y.  
1088 Microcystin-LR ameliorates pulmonary fibrosis via modulating CD206(+) M2-like  
1089 macrophage polarization. *Cell Death Dis*. 2020;11:136. doi: 10.1038/s41419-020-2329-z
- 1090 64. Carlson S, Helterline D, Asbe L, Dupras S, Minami E, Farris S, Stempien-Otero A.  
1091 Cardiac macrophages adopt profibrotic/M2 phenotype in infarcted hearts: Role of  
1092 urokinase plasminogen activator. *J Mol Cell Cardiol*. 2017;108:42-49. doi:  
1093 10.1016/j.yjmcc.2016.05.016
- 1094 65. Sieweke MH, Allen JE. Beyond stem cells: self-renewal of differentiated macrophages.  
1095 *Science*. 2013;342:1242974. doi: 10.1126/science.1242974
- 1096 66. Martinez FO, Helming L, Milde R, Varin A, Melgert BN, Draijer C, Thomas B, Fabbri M,  
1097 Crawshaw A, Ho LP, et al. Genetic programs expressed in resting and IL-4 alternatively  
1098 activated mouse and human macrophages: similarities and differences. *Blood*.  
1099 2013;121:e57-69. doi: 10.1182/blood-2012-06-436212
- 1100 67. Kim JE, Jung K, Kim JA, Kim SH, Park HS, Kim YS. Engineering of anti-human  
1101 interleukin-4 receptor alpha antibodies with potent antagonistic activity. *Sci Rep*.  
1102 2019;9:7772. doi: 10.1038/s41598-019-44253-9
- 1103 68. Holcomb IN, Kabakoff RC, Chan B, Baker TW, Gurney A, Henzel W, Nelson C, Lowman  
1104 HB, Wright BD, Skelton NJ, et al. FIZZ1, a novel cysteine-rich secreted protein  
1105 associated with pulmonary inflammation, defines a new gene family. *EMBO J*.  
1106 2000;19:4046-4055. doi: 10.1093/emboj/19.15.4046
- 1107 69. Chemaly ER, Hadri L, Zhang S, Kim M, Kohlbrenner E, Sheng J, Liang L, Chen J, P KR,  
1108 Hajjar RJ, et al. Long-term in vivo resistin overexpression induces myocardial  
1109 dysfunction and remodeling in rats. *J Mol Cell Cardiol*. 2011;51:144-155. doi:  
1110 10.1016/j.yjmcc.2011.04.006
- 1111 70. Takeishi Y, Niizeki T, Arimoto T, Nozaki N, Hirono O, Nitobe J, Watanabe T, Takabatake  
1112 N, Kubota I. Serum resistin is associated with high risk in patients with congestive heart  
1113 failure--a novel link between metabolic signals and heart failure. *Circ J*. 2007;71:460-464.  
1114 doi: 10.1253/circj.71.460  
1115

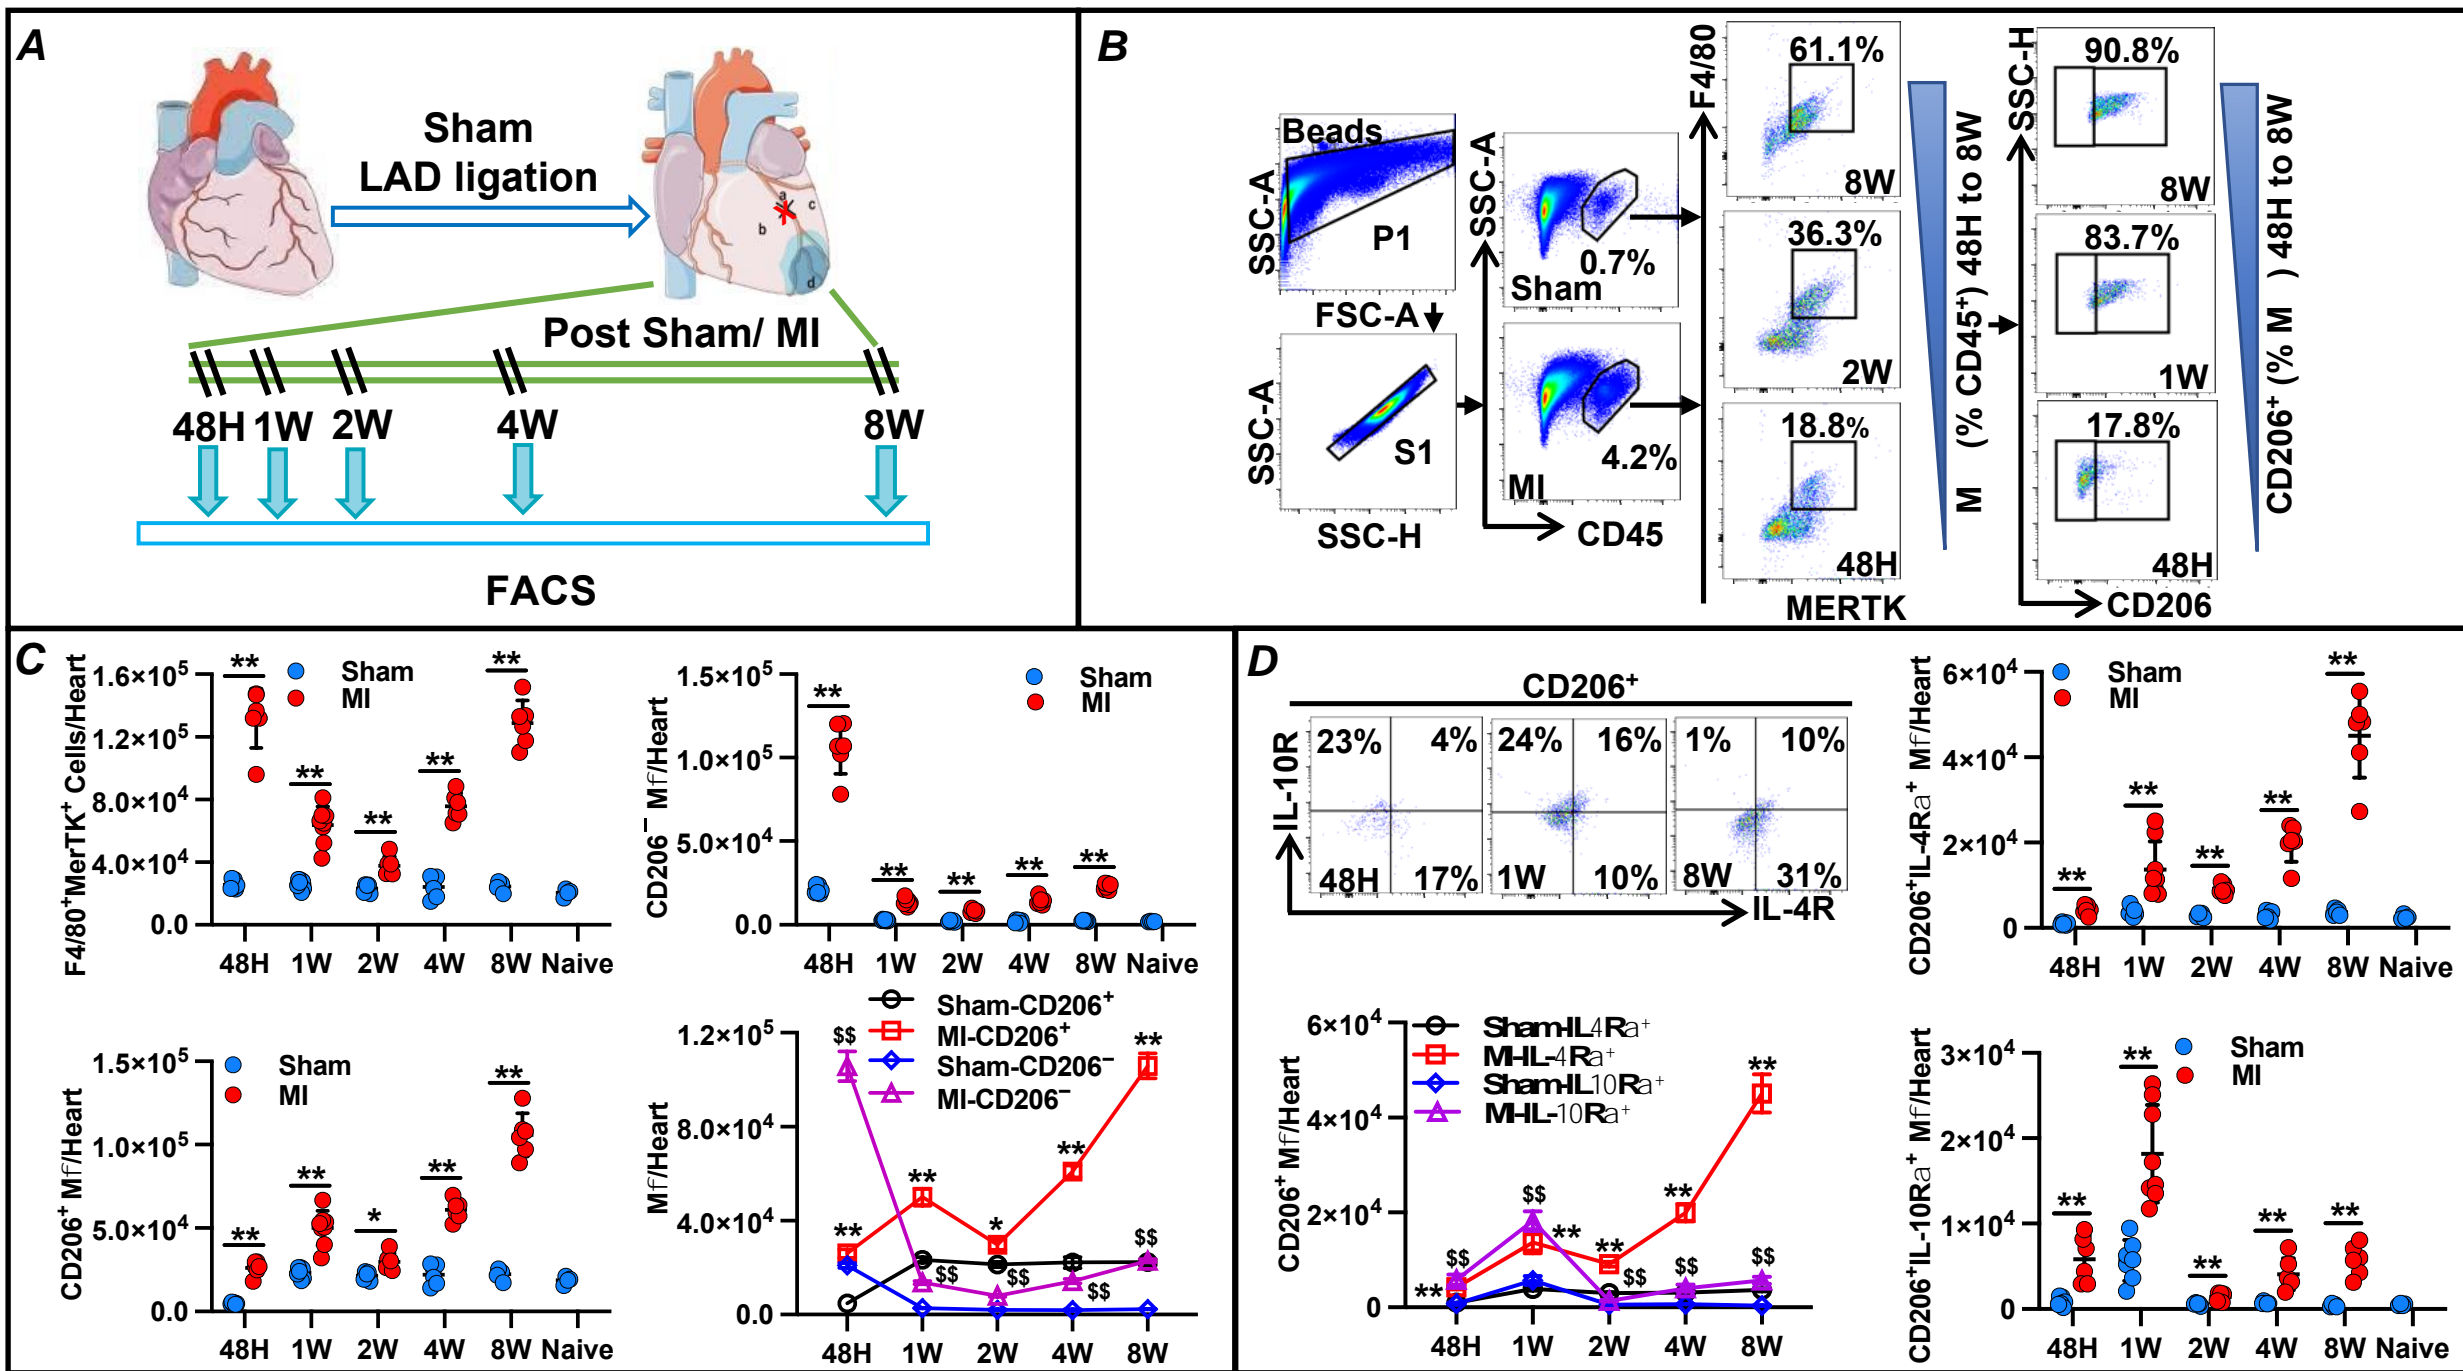

Figure 1



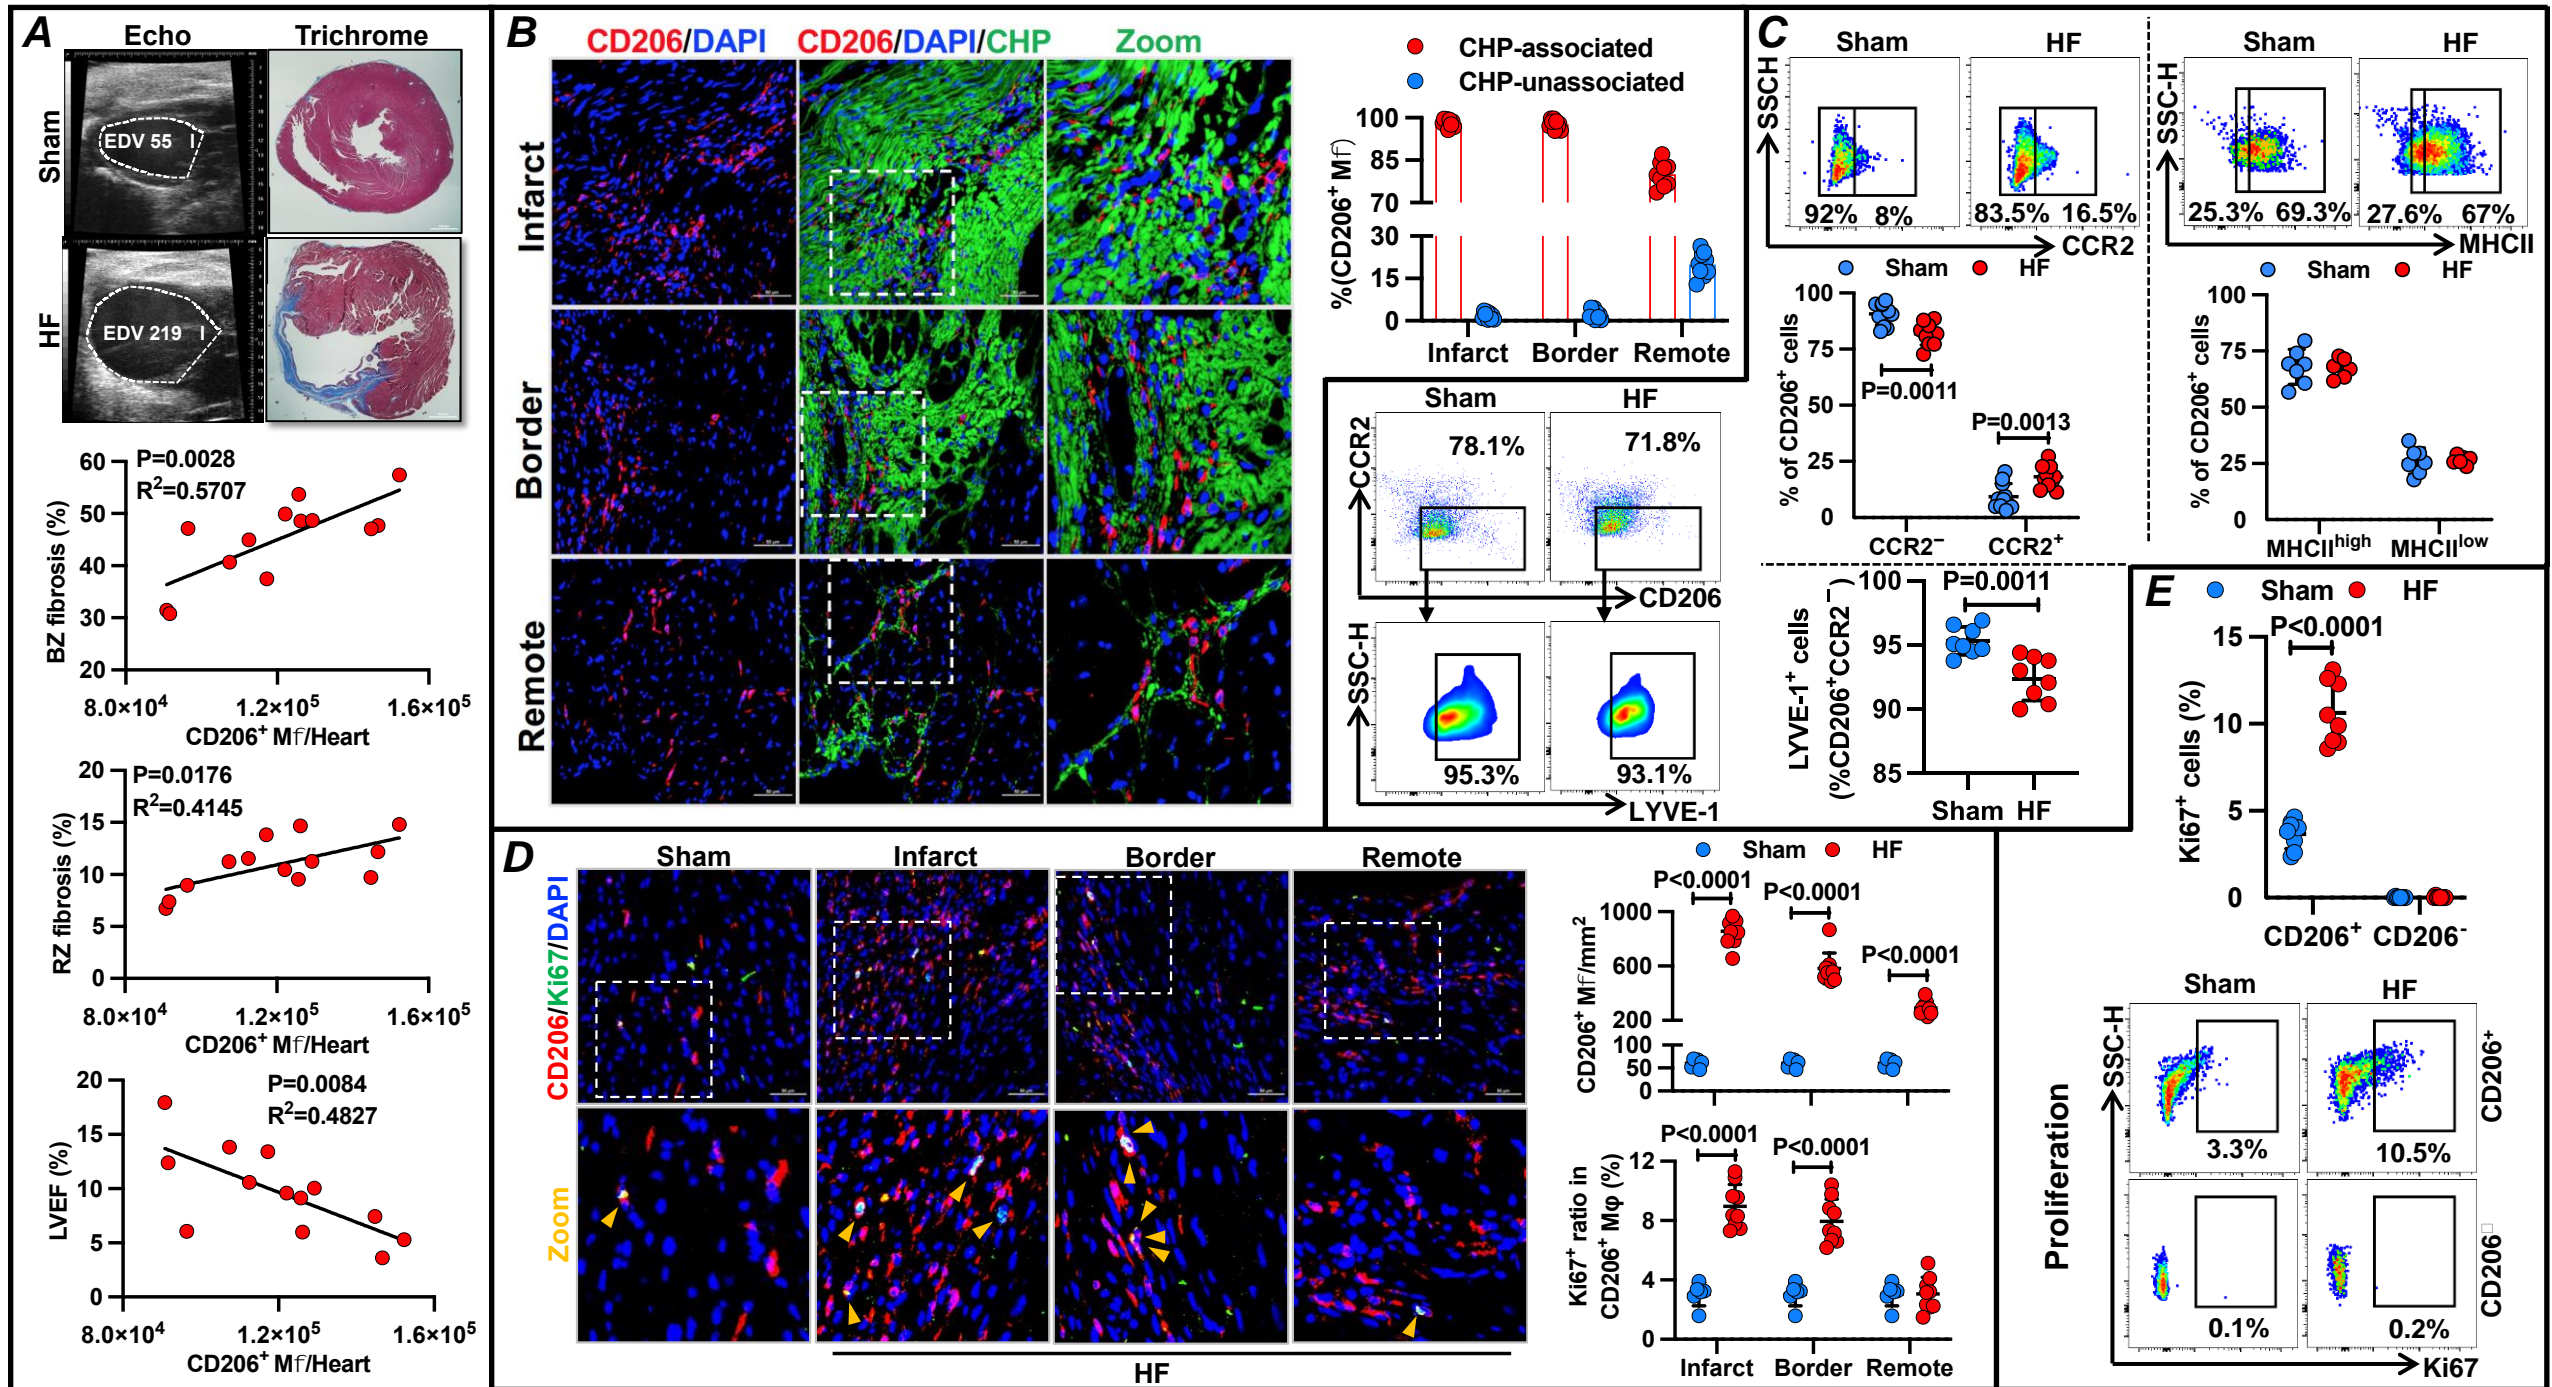

Figure 2

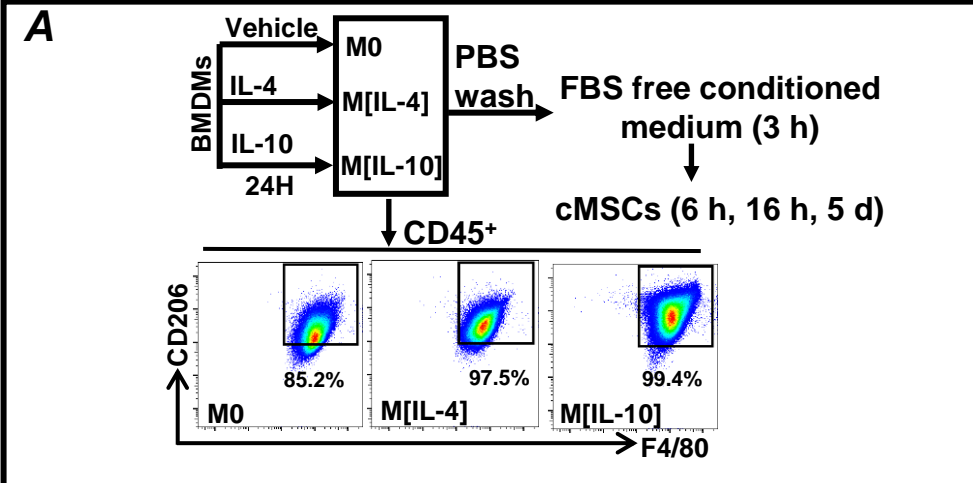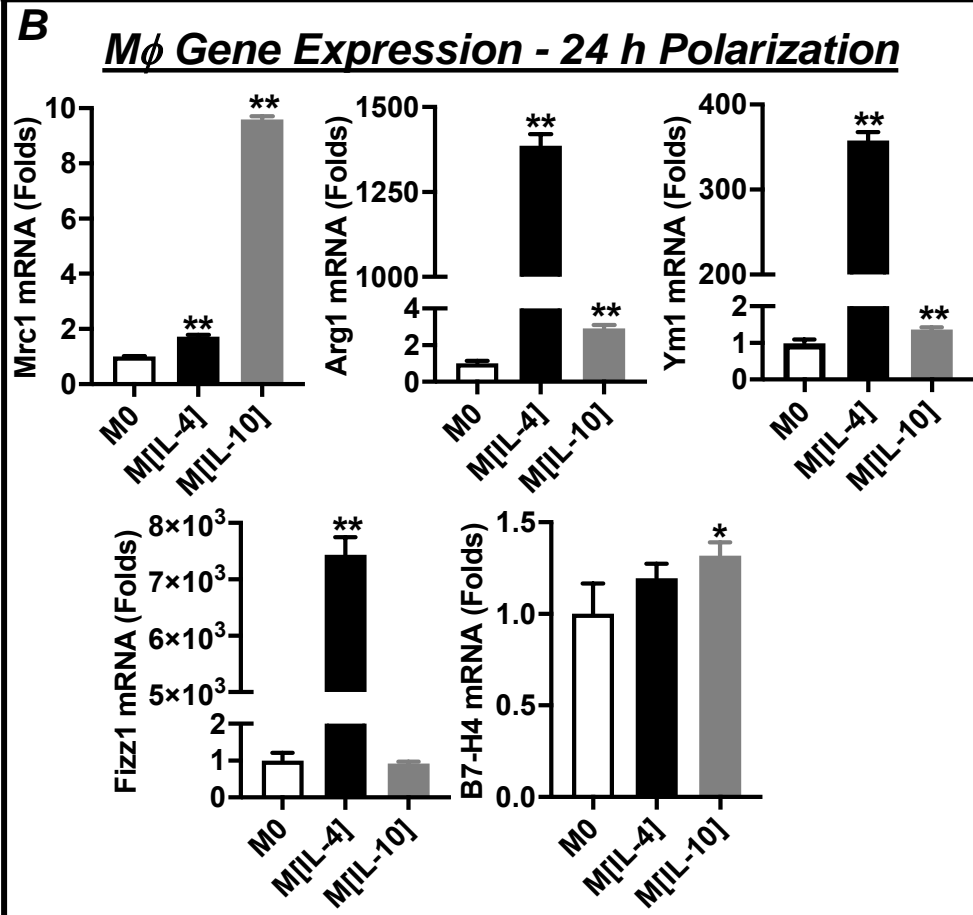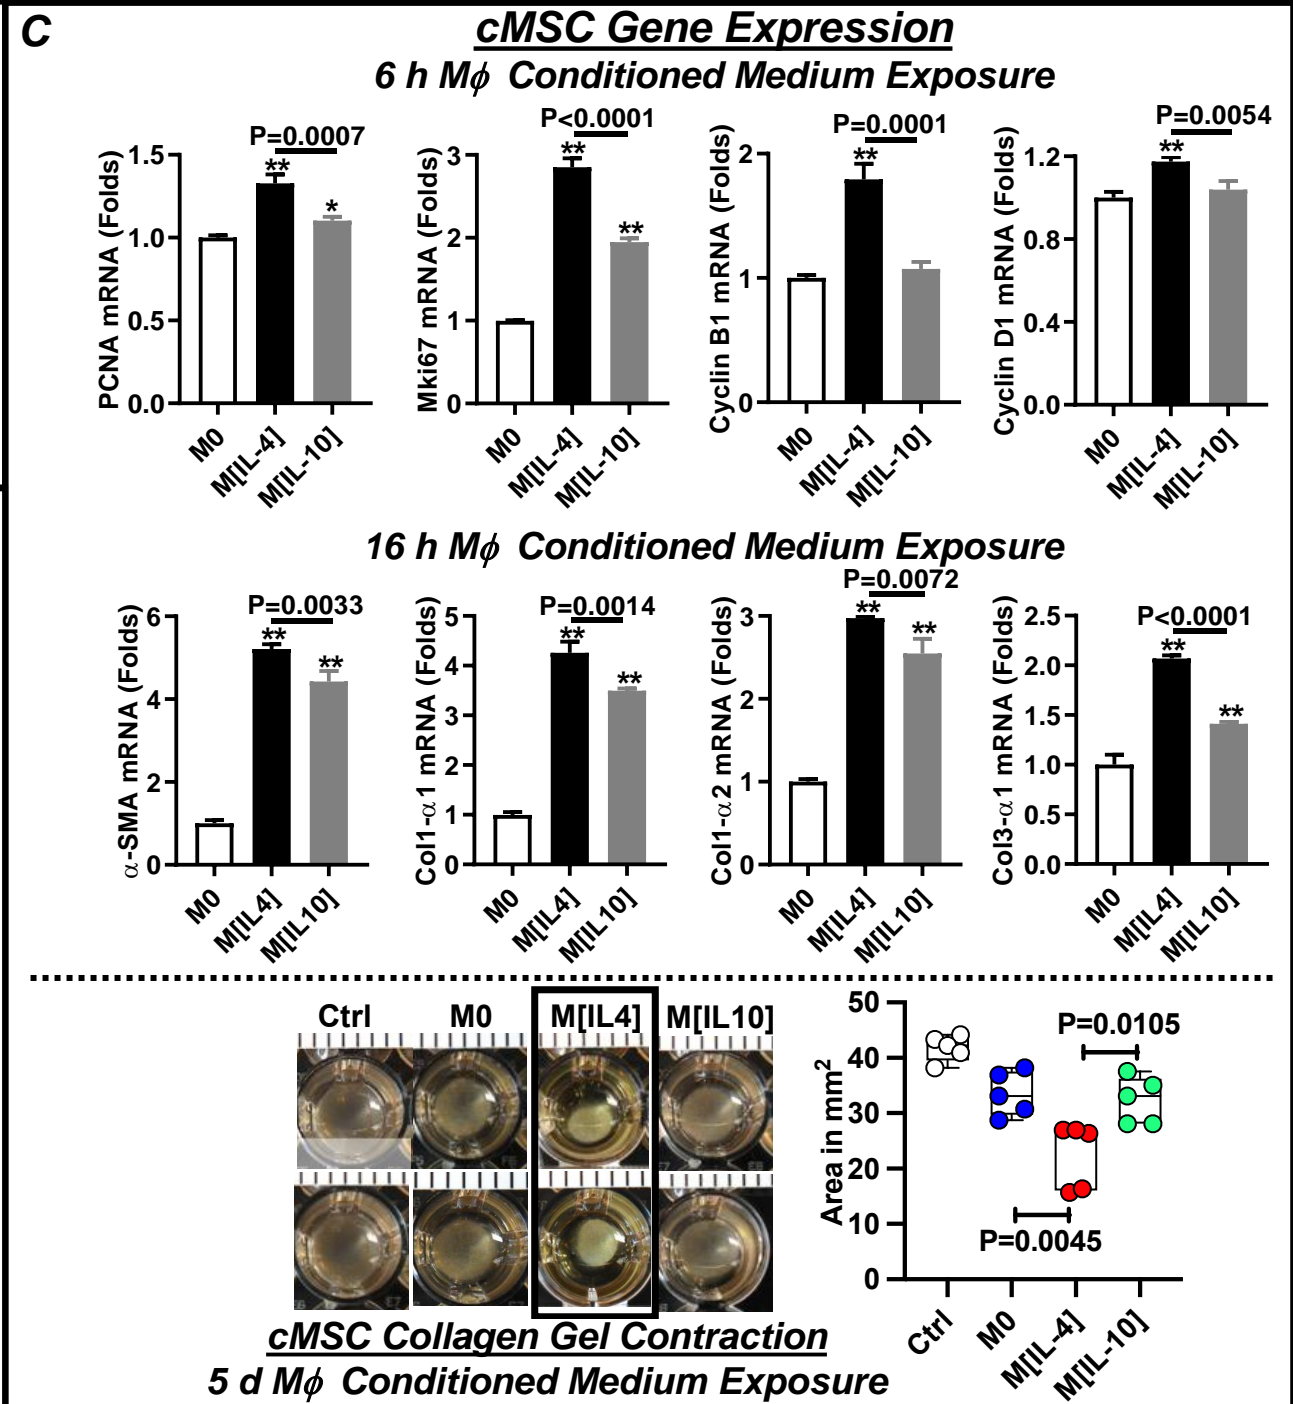

Figure 3



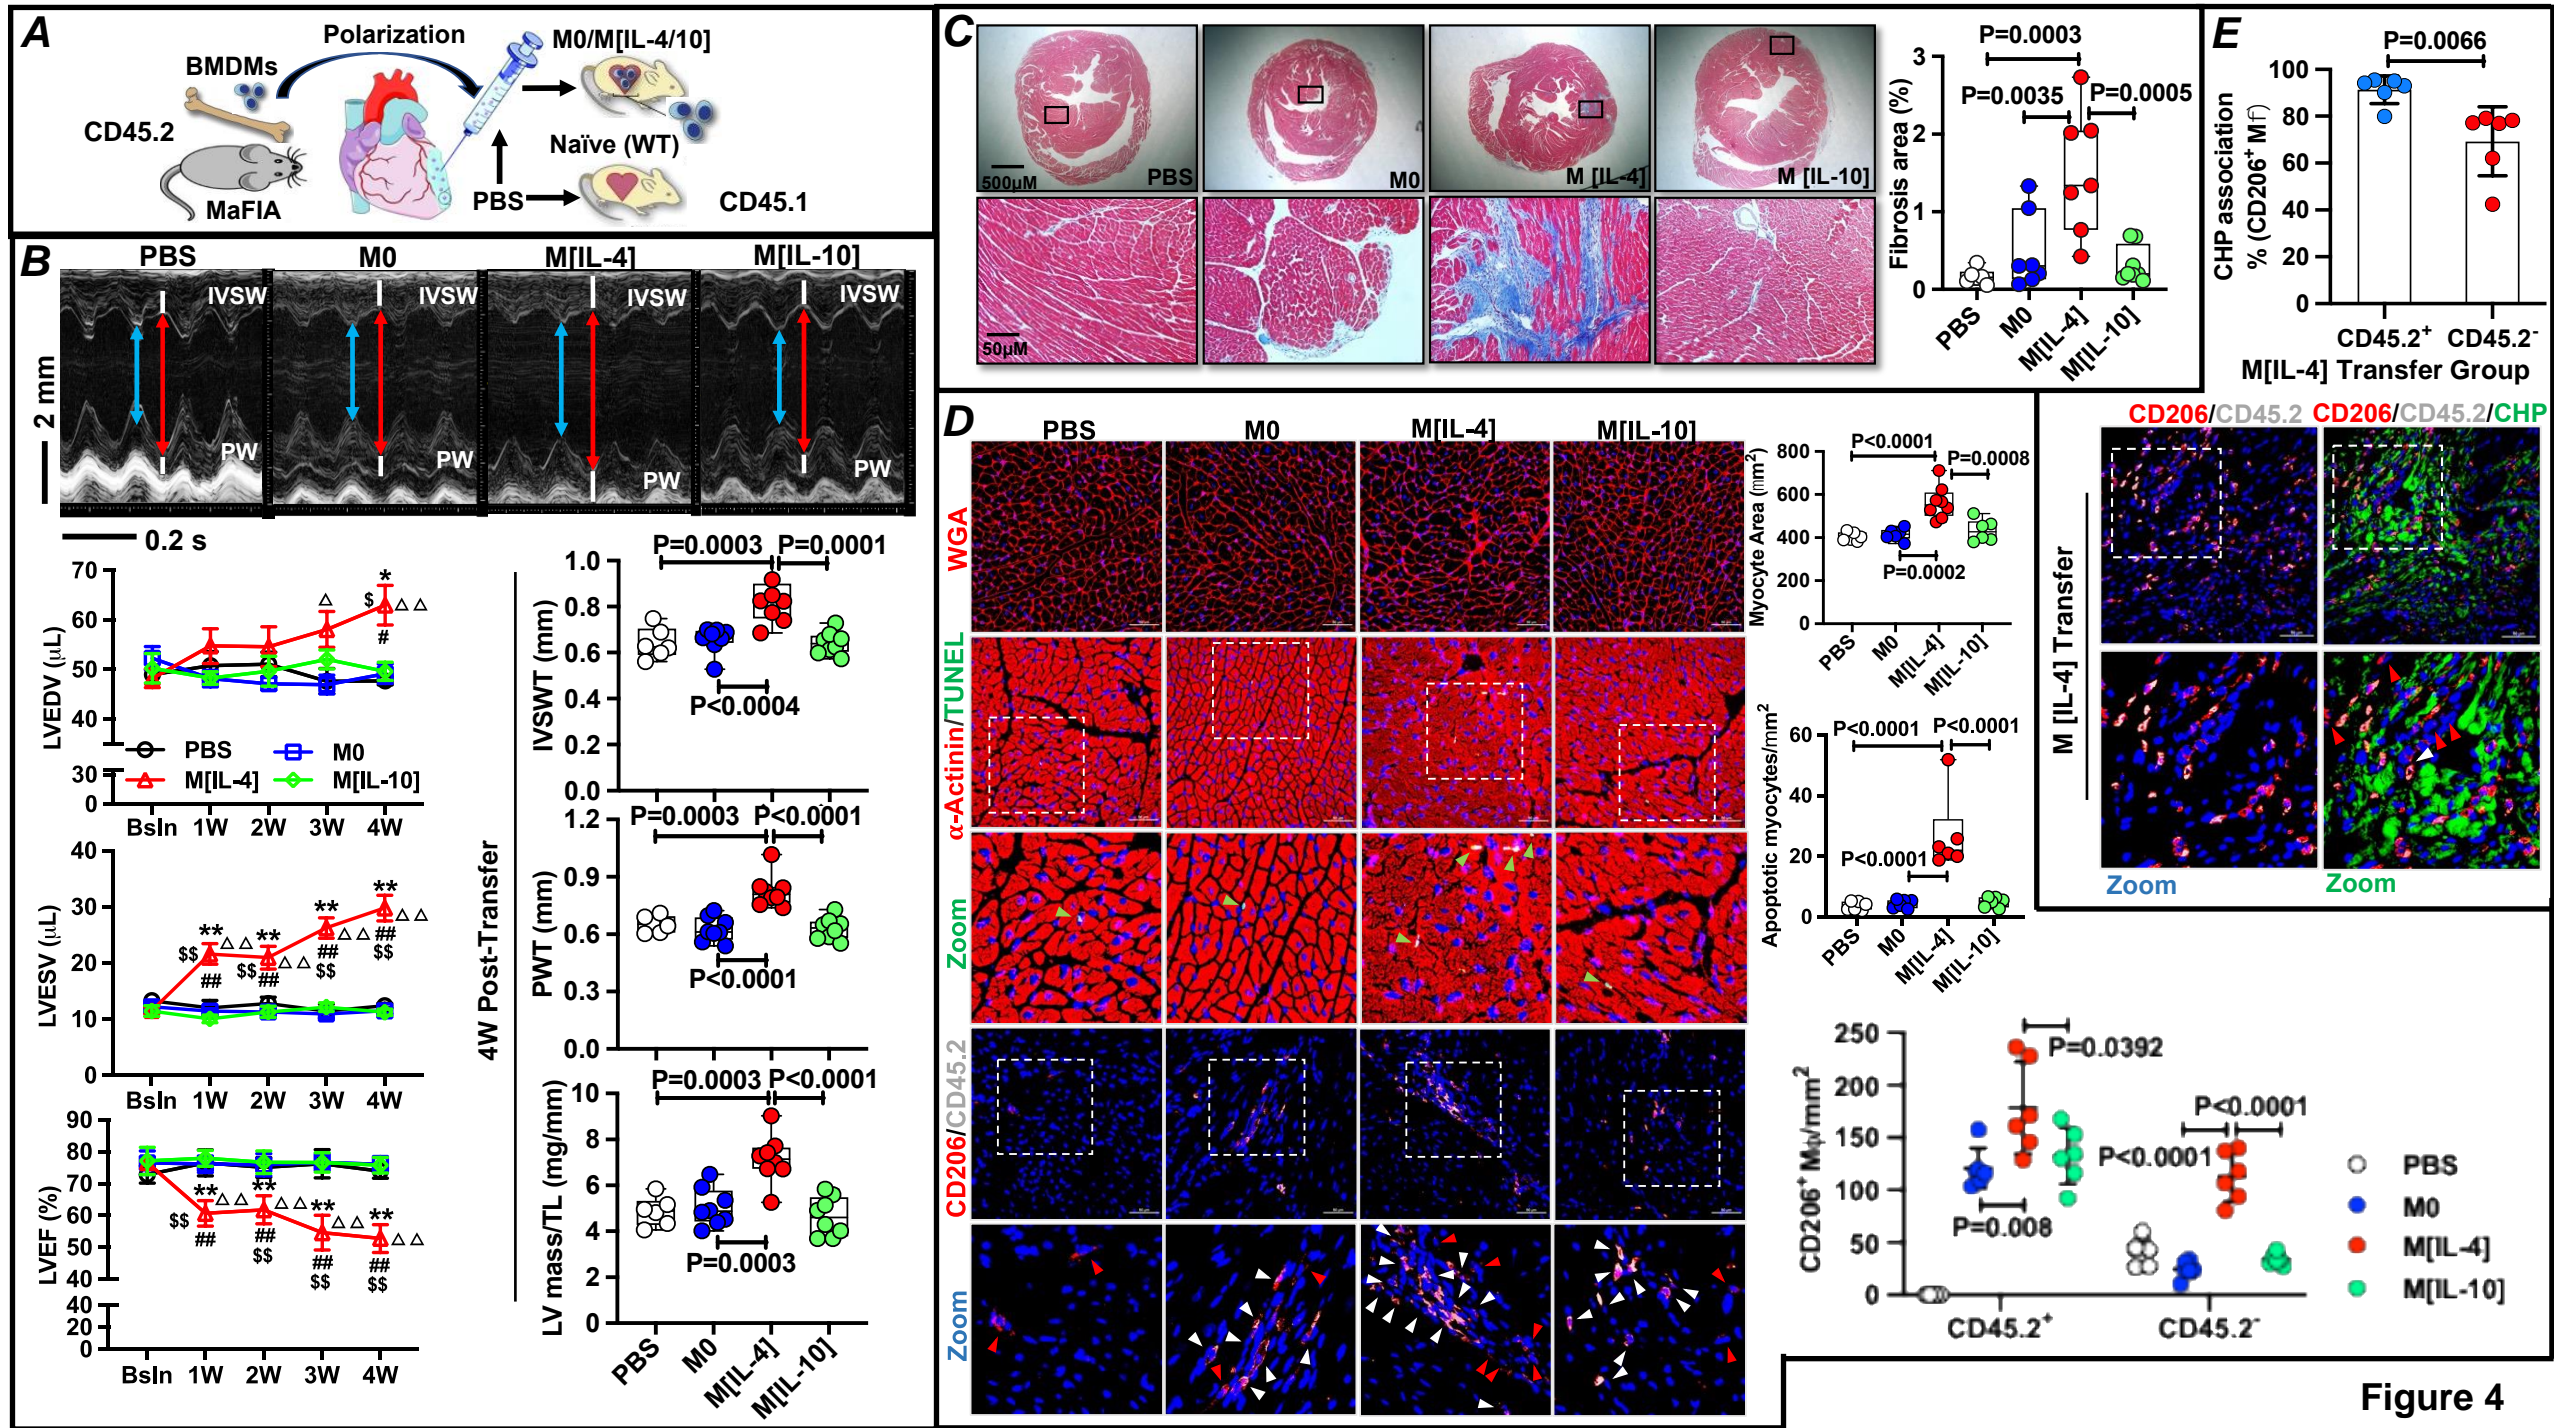



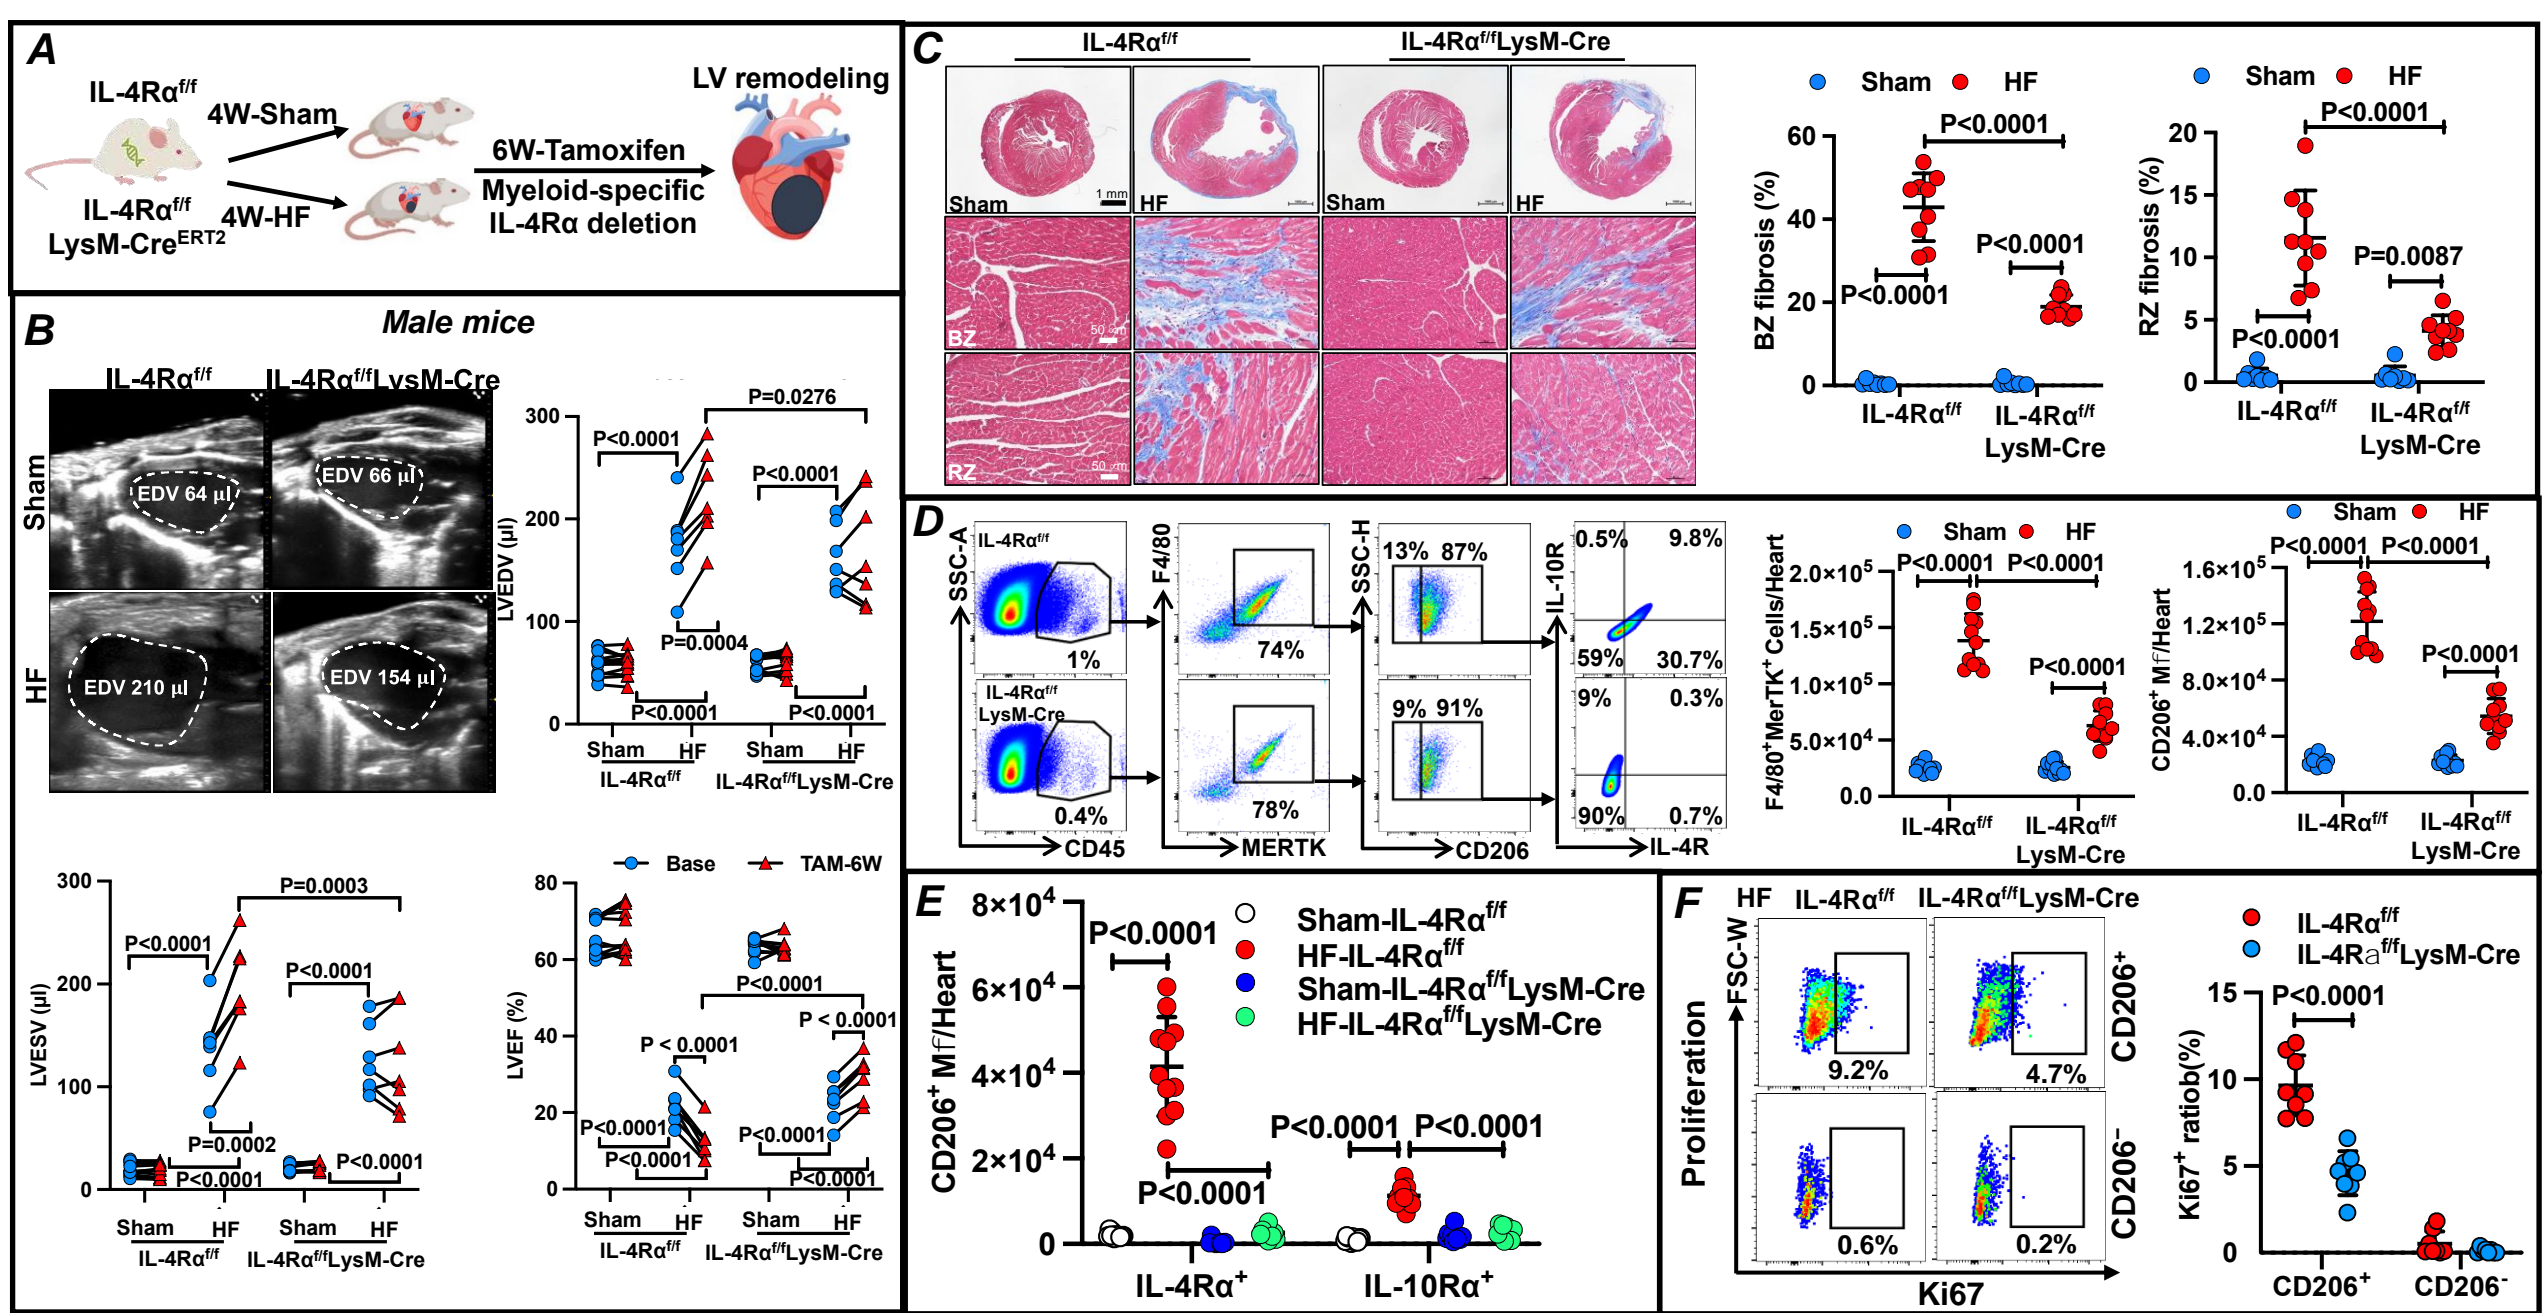

Figure 5

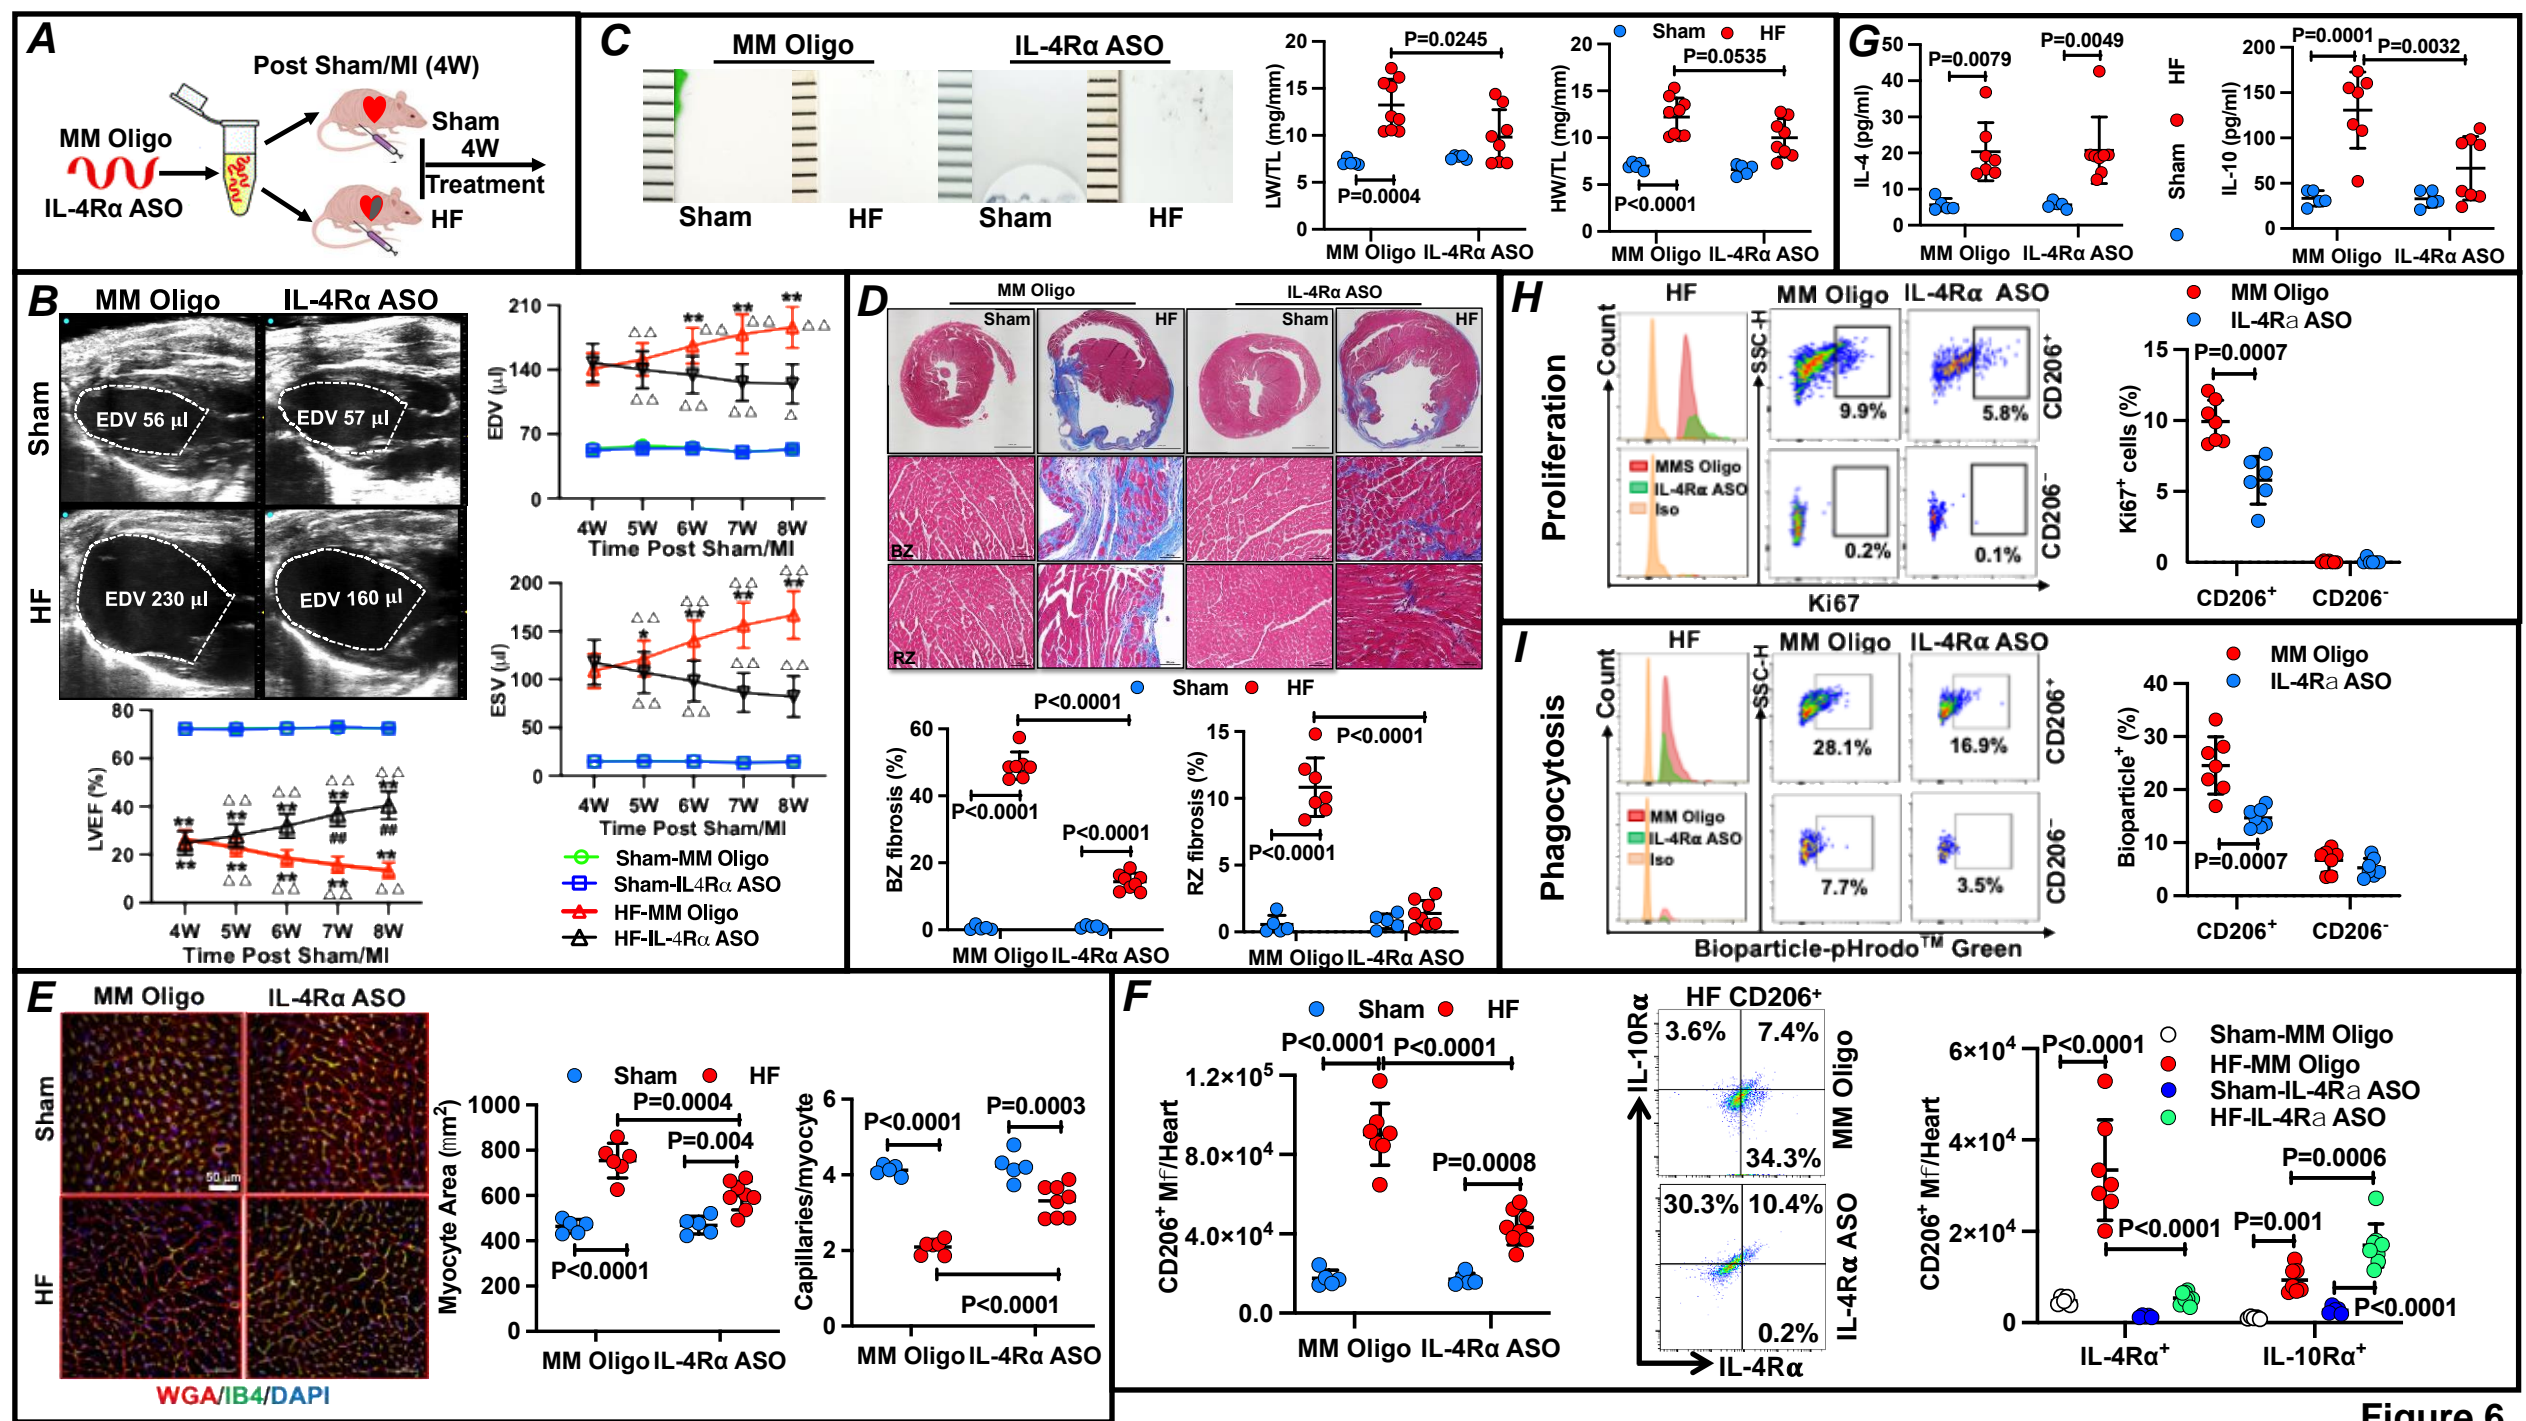

Figure 6



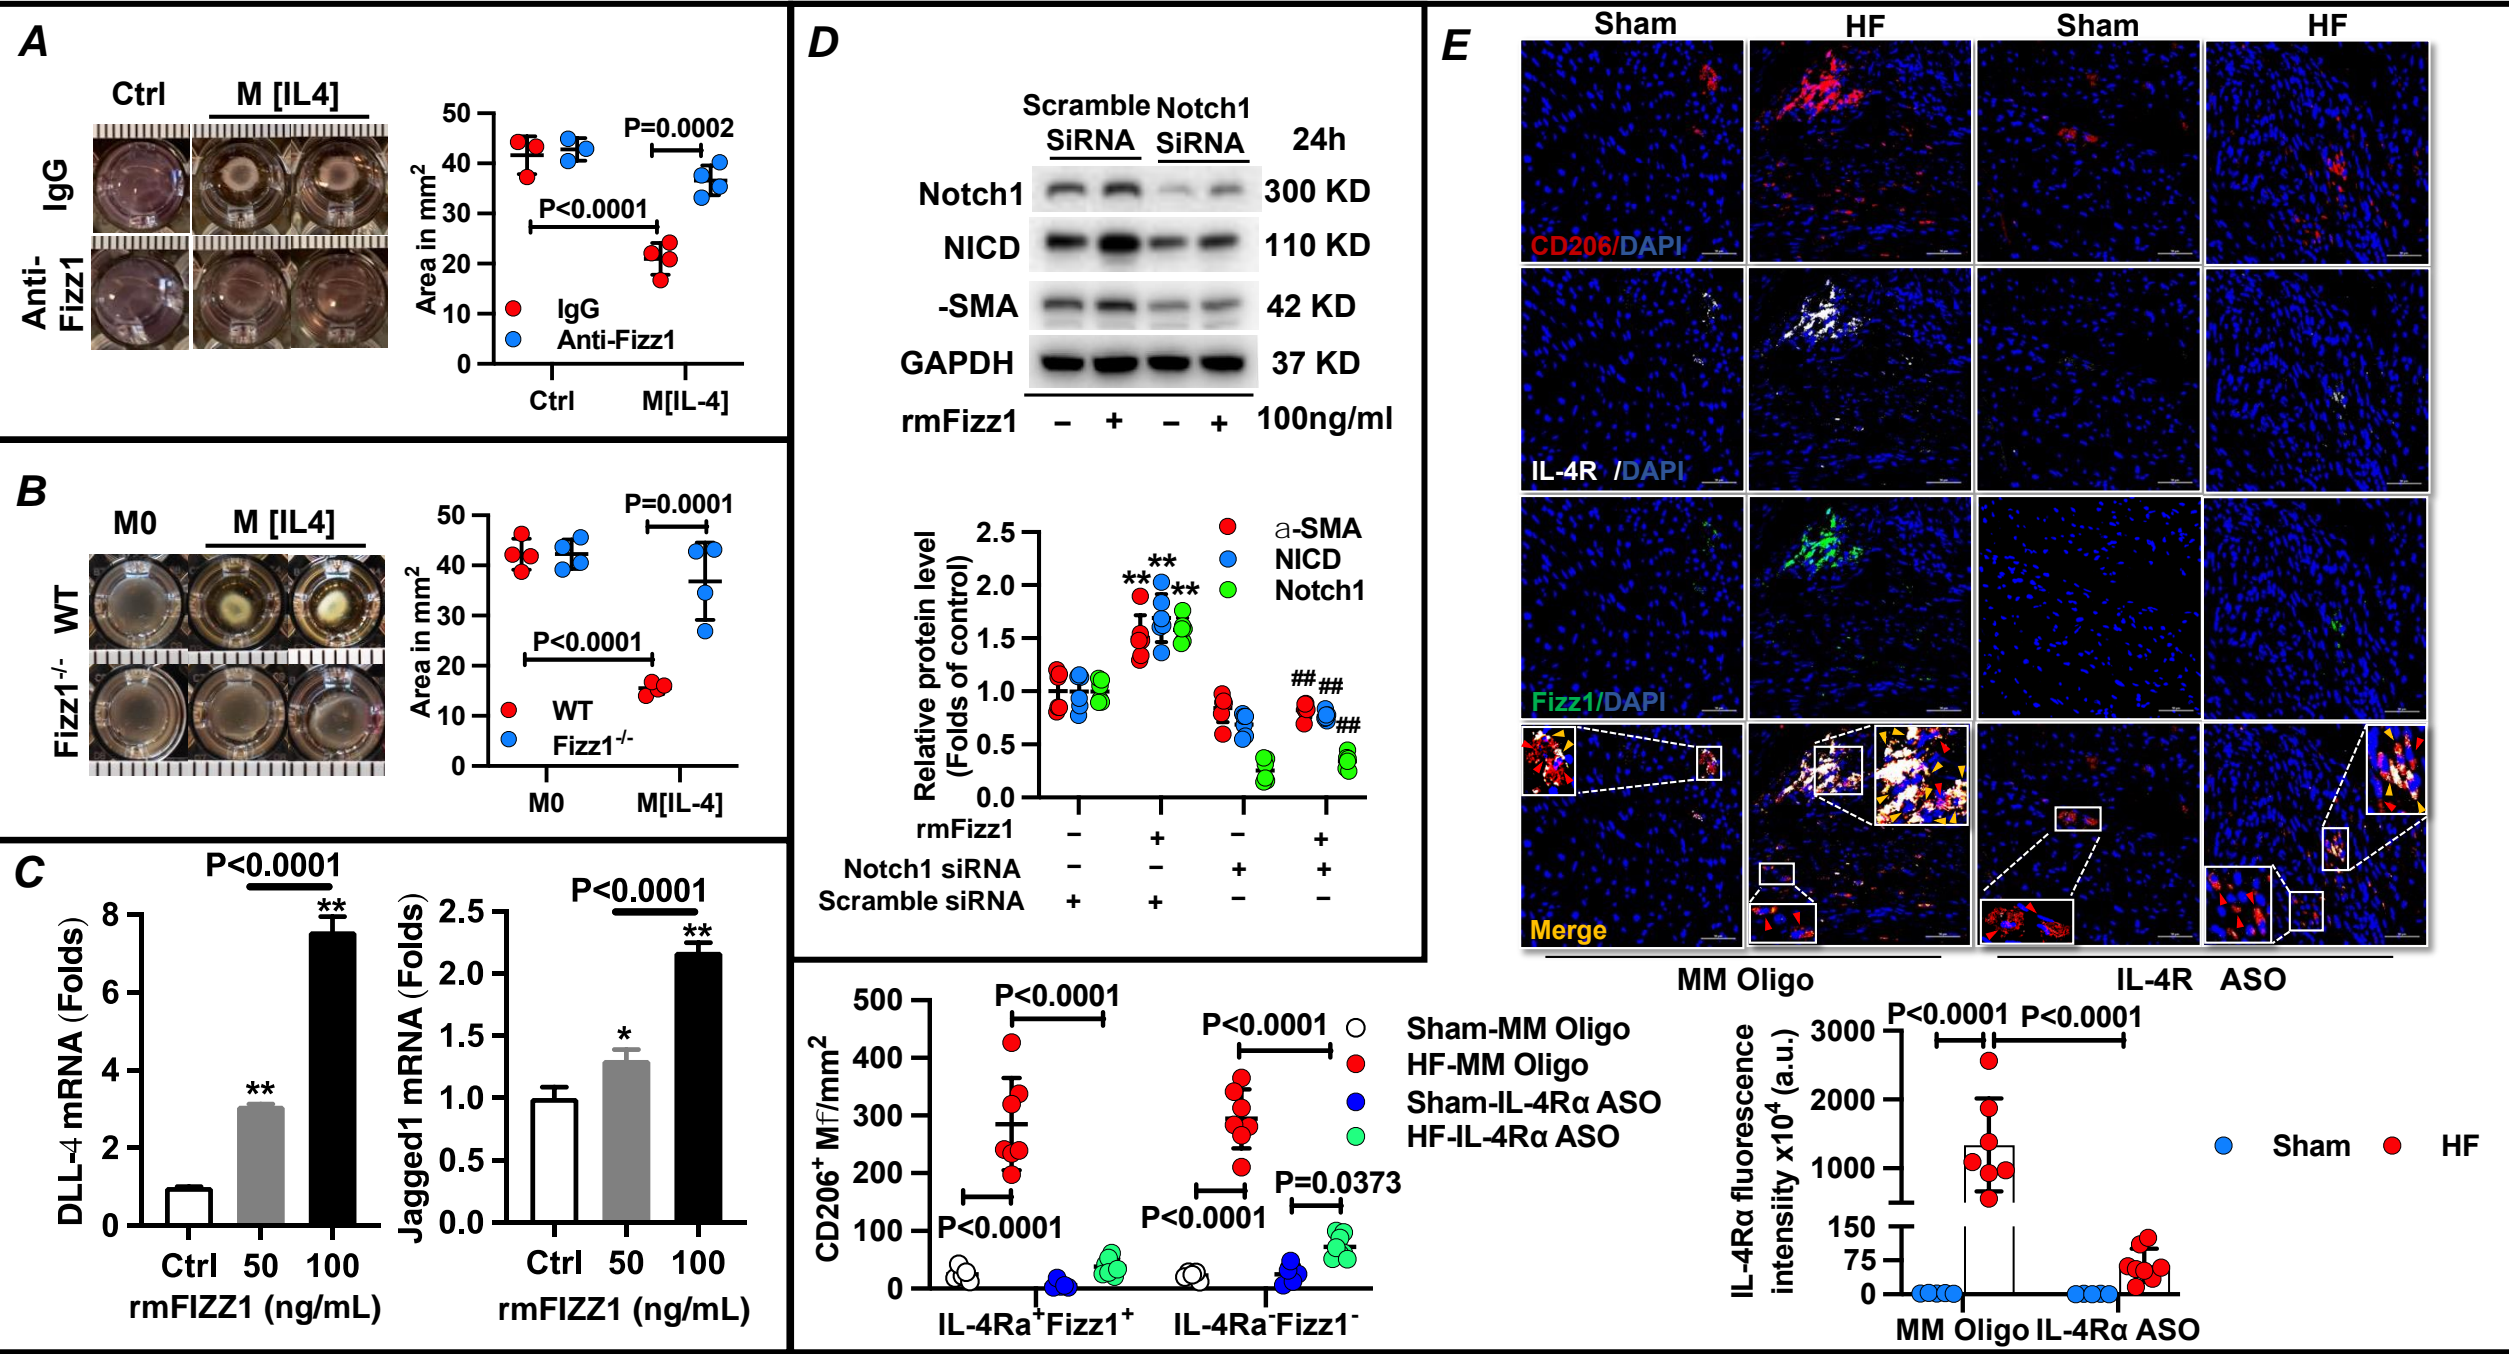

Figure 7

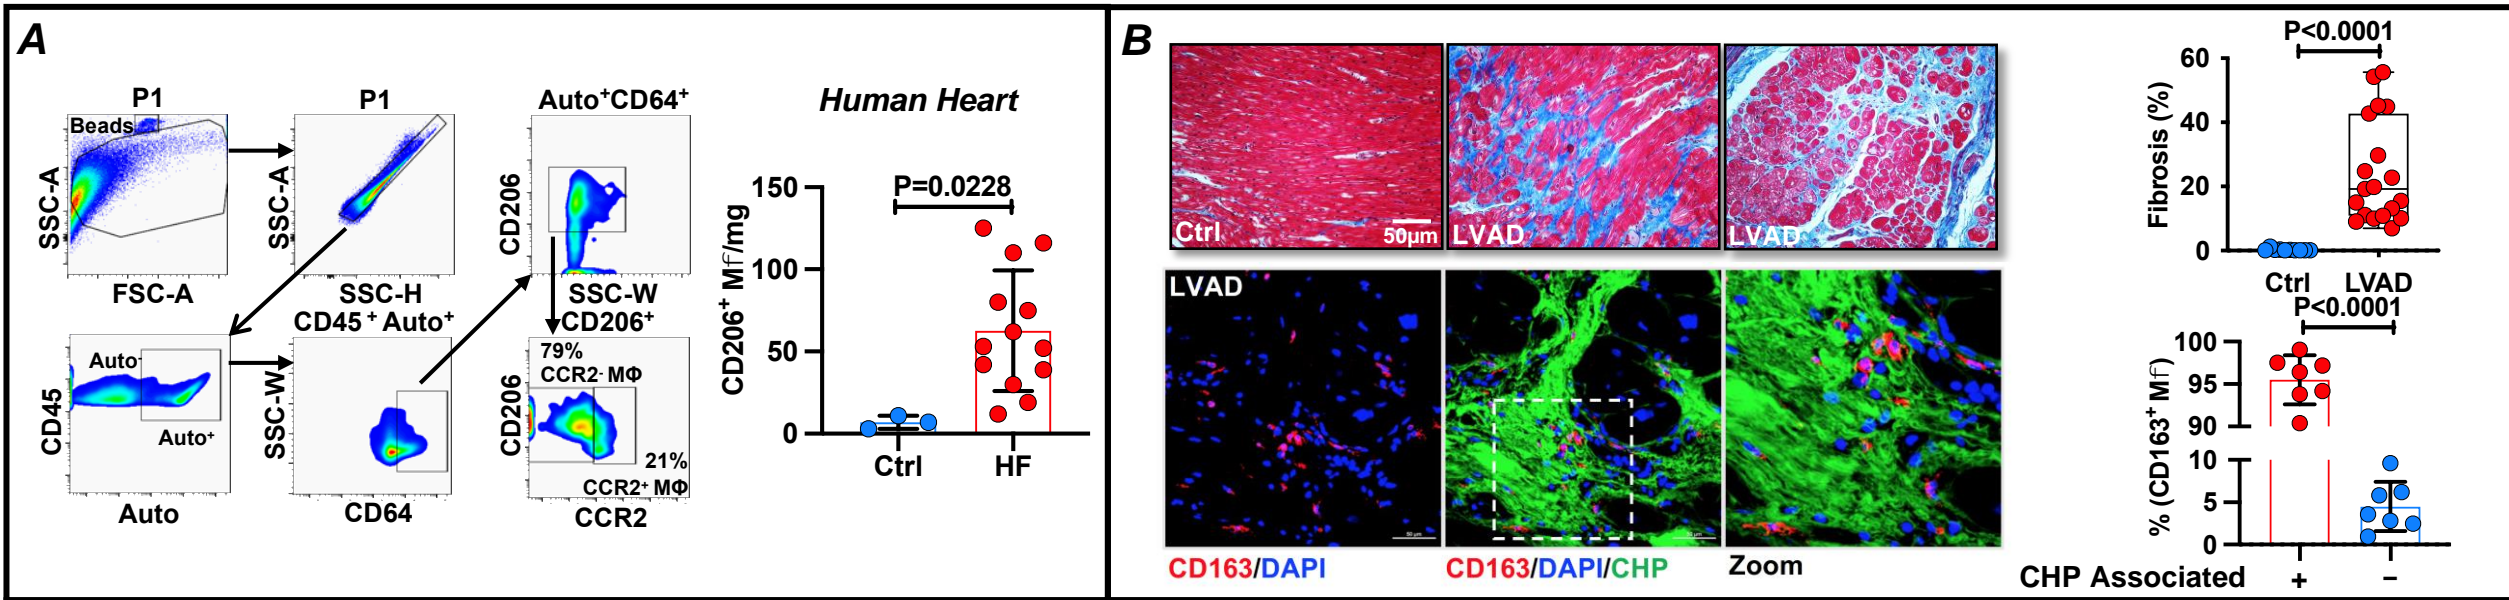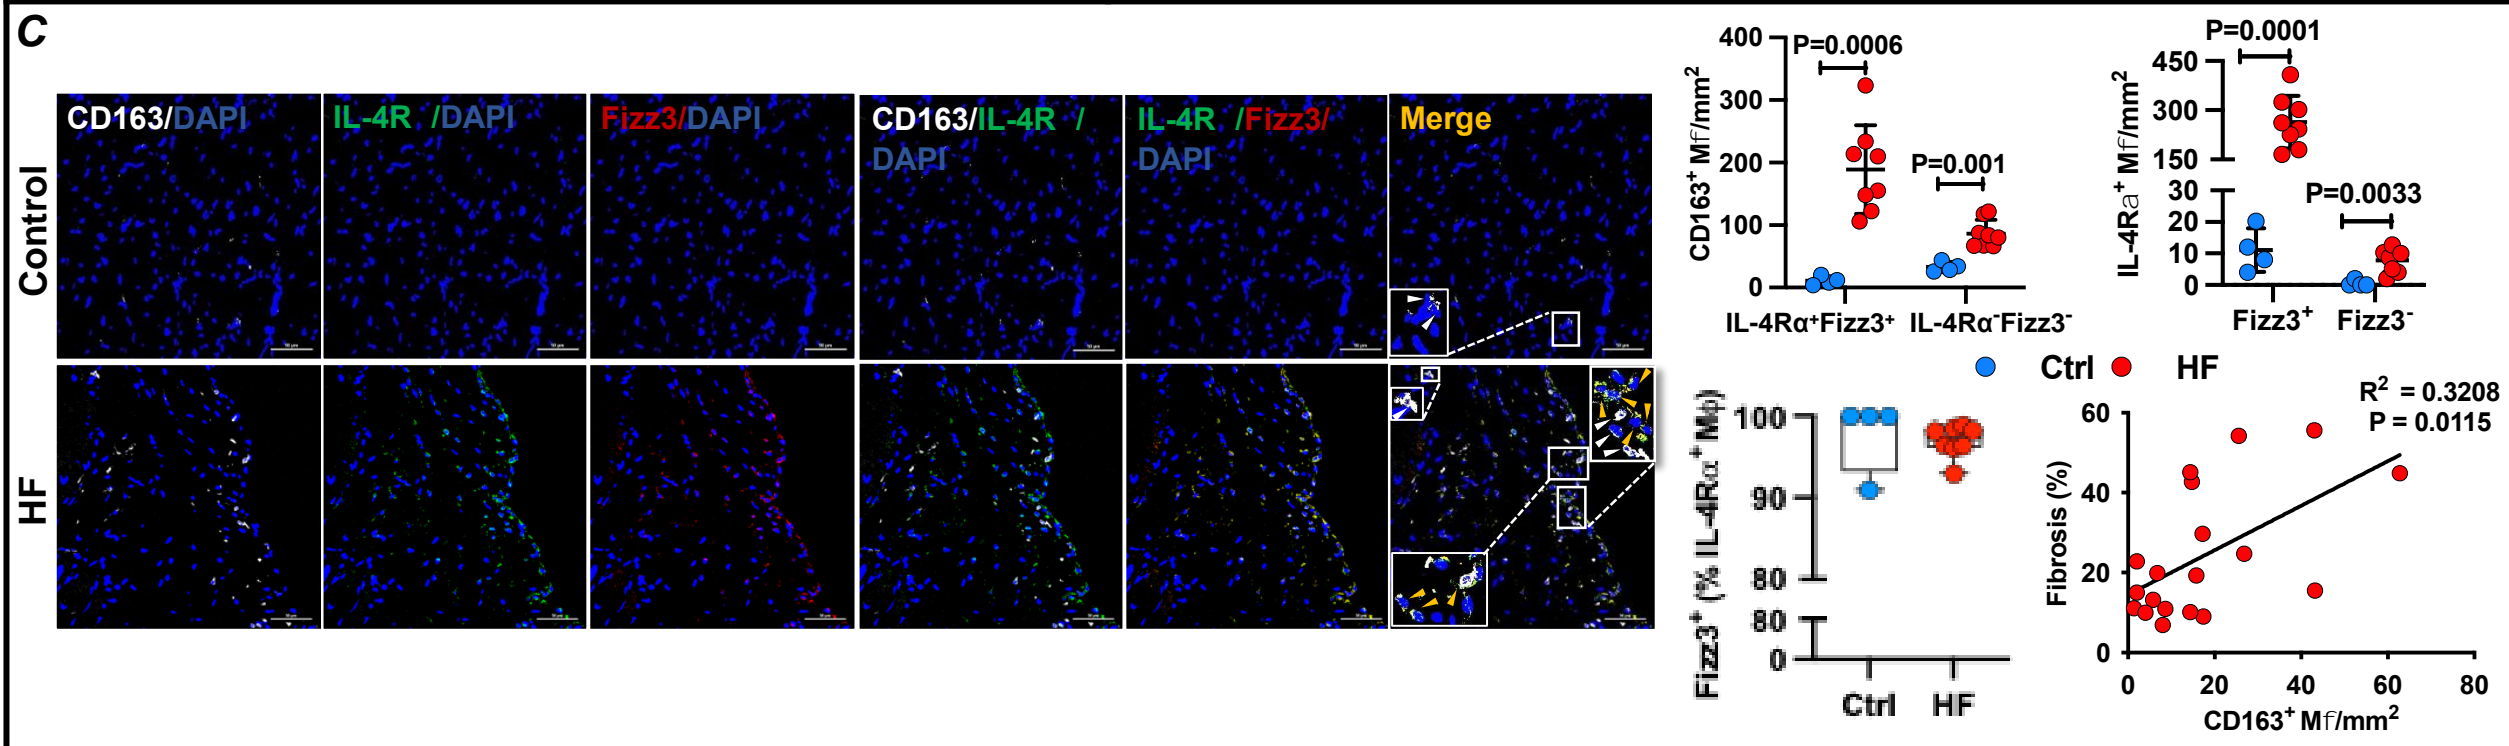

Figure 8
